1 **Rapid mortality in captive bush dogs (*Speothos venaticus*) caused by influenza A of avian origin**  
2 **(H5N1) at a wildlife collection in the United Kingdom**

3

4 Marco Falchieri<sup>1</sup>, Scott M. Reid<sup>1</sup>, Akbar Dastderji<sup>2</sup>, Jonathan Cracknell<sup>3</sup>, Caroline J. Warren<sup>1</sup>,  
5 Benjamin C. Mollett<sup>1</sup>, Jacob Peers-Dent<sup>1</sup>, Audra-Lynne D Schlachter<sup>4</sup>, Natalie McGinn<sup>1</sup>, Richard  
6 Hepple<sup>5</sup>, Saumya Thomas<sup>1</sup>, Susan Ridout<sup>6</sup>, Jen Quayle<sup>3</sup>, Romain Pizzi<sup>3</sup>, Alejandro Núñez<sup>4</sup>, Alexander  
7 M. P. Byrne<sup>1,8</sup>, Joe James<sup>1,7</sup> and Ashley C. Banyard<sup>1,7\*</sup>

8

9 **Affiliations:**

10 <sup>1</sup> Influenza and Avian Virology Team, Department of Virology, Animal and Plant Health Agency  
11 (APHA-Weybridge), Woodham Lane, Addlestone, Surrey KT15 3NB, UK

12 <sup>2</sup> Mammalian Virology Investigation Unit, Department of Virology, Animal and Plant Health Agency  
13 (APHA-Weybridge), Woodham Lane, Addlestone, Surrey KT15 3NB, UK

14 <sup>3</sup> Knowsley Safari, Prescot, Merseyside L34 4AN, UK

15 <sup>4</sup> Department of Pathology and Animal Sciences, Animal and Plant Health Agency (APHA-  
16 Weybridge), Woodham Lane, Addlestone, Surrey KT15 3NB, UK

17 <sup>5</sup> APHA Field Epidemiology team, APHA Bridgwater, Rivers House, East Quay, Bridgwater, TA6  
18 4YS

19 <sup>6</sup> APHA Field Epidemiology team, APHA Hornbeam House, Electra Way, Crewe, Cheshire, CW1  
20 6GJ

21 <sup>7</sup> WOA/FAO International Reference Laboratory for Avian Influenza, Animal and Plant Health  
22 Agency (APHA-Weybridge), Woodham Lane, Addlestone, Surrey KT15 3NB, UK

23 <sup>8</sup> Worldwide Influenza Centre, The Francis Crick Institute, Midland Road, London. NW1 1AT

24

25 **Corresponding author:** Ashley C. Banyard ([Ashley.Banyard@apha.gov.uk](mailto:Ashley.Banyard@apha.gov.uk))

26

27 **Keywords:** Avian influenza; systemic infection; bush dogs; conservation species; terrestrial  
28 carnivores; H5N1; high pathogenicity; zoonotic assessment

29

30 **Abstract**

31 Europe has suffered unprecedented epizootics of high pathogenicity avian influenza (HPAI) clade  
32 2.3.4.4b H5N1 since Autumn 2021. As well as impacting upon commercial and wild avian species,  
33 the virus has also infected mammalian species more than ever observed previously. Mammalian  
34 species involved in spill over events have primarily been scavenging terrestrial carnivores and farmed  
35 mammalian species although marine mammals have also been affected. Alongside reports of  
36 detections in mammalian species found dead through different surveillance schemes, several mass  
37 mortality events have been reported in farmed and wild animals. During November 2022, an unusual  
38 mortality event was reported in captive bush dogs (*Speothos venaticus*) with clade 2.3.4.4b H5N1  
39 HPAIV of avian origin being the causative agent. The event involved an enclosure of fifteen bush  
40 dogs, ten of which succumbed during a nine-day period with some dogs exhibiting neurological  
41 disease. Ingestion of infected meat is proposed as the most likely infection route.

42

## 43 **Introduction**

44 High pathogenicity avian influenza virus (HPAIV) has caused significant mortalities across avian  
45 species since the emergence of H5Nx clade 2.3.4.4 viruses in Europe and the United Kingdom (UK)  
46 in 2014 (1, 2). In recent years, these viruses have undergone rounds of genetic diversification and  
47 caused repeated detections of H5Nx HPAIVs in poultry and wild birds, with each epizootic following  
48 a seasonal pattern. In Autumn 2021 the situation escalated significantly with clade 2.3.4.4b HPAIV  
49 H5N1 emerging to cause global outbreaks at a level never seen before (3, 4). Between 2014 and 2020,  
50 spillover of avian influenza infection into mammals was uncommon although occasional reports in  
51 both wild and captive mammals have been described (5, 6). With the escalation of H5N1 outbreaks  
52 during 2020/21 (3, 7), through the summer of 2021 (8) and into 2022/23 (4, 7, 9), infection pressure in  
53 the environment, as a result of high mortality levels in wild birds has led to an increase in the  
54 occurrence of spill over events globally (5, 10-18). To date, almost all detections in mammals have  
55 involved wild scavenging species that have most likely become infected following the ingestion of  
56 infected wild bird carcasses in the environment. These events have affected a broad range of species  
57 of both terrestrial and marine habitats (9, 19). Importantly, with the vast majority of cases the  
58 infection was reported in a single mammal following an undefined exposure to infectious material.  
59 However, on occasion, mammalian infection with avian origin H5N1 HPAIV has been implicated as  
60 the cause of mass mortalities. This has occurred most notably in natural events whereby wild animals  
61 have been affected (e.g., seals in the United States and sea lions in Peru (20, 21)) as well as in farmed  
62 species (farmed mink in Spain (22), farmed foxes in Finland (23)) and domesticated species (cats in  
63 Poland (24, 25) and South Korea (26)). These events have triggered interest in the potential for  
64 mammal-to-mammal transmission and in any resultant genetic adaptation. Assessment of transmission  
65 is undertaken both through epidemiological investigation and by thorough phylogenetic analysis with  
66 subsequent interrogation for potential adaptive mutations that may confer a replicative advantage to  
67 the novel mammal host (27). Whilst these outbreaks have shown concurrent infection of multiple  
68 individuals with the same virus, data supporting active transmission between mammals is lacking and  
69 a definitive conclusion on the ability of these viruses to spread directly from mammal to mammal has  
70 not been reached. On top of mortality events within the veterinary sector, this clade 2.3.4.4b H5N1

71 HPAIV has also been associated with human infection, with outcomes varying from asymptomatic to  
72 severe with hospitalisation of infected individuals (19, 28-34). These features have raised the zoonotic  
73 profile of the currently circulating H5N1 clade 2.3.4.4b HPAIV, although again human-to-human  
74 transmission has not been demonstrated.

75 Here we report on the infection and severe mortality within a pack of bush dogs (*Speothos*  
76 *venaticus*) in captivity with avian origin H5N1 clade 2.3.4.4b HPAIV. Bush dogs are a near  
77 threatened species of wild canids that are of conservation concern. Wild populations of these dogs  
78 range from northern regions of Panama (Central America) to northeastern Argentina and Paraguay;  
79 with populations also being present in Colombia, Venezuela, the Guianas, Brazil, and eastern Bolivia  
80 and Peru. This species is characterized by its small size, elongated body, small eyes, short snout, short  
81 tail, short legs, and small and rounded ears, in addition to gregarious and diurnal behaviour (35).

82 In this disease event which occurred in November 2022, two thirds of the pack of bush dogs, held  
83 captive in a wildlife collection the UK, became clinically unwell with a disease that had a short  
84 duration and led to death and/or the need for euthanasia on welfare grounds with a range of clinical  
85 signs including neurological disease. Avian influenza was not suspected at first and several tests and  
86 analysis were performed at private laboratories to ascertain cause of death and to exclude the  
87 involvement of more common canine pathogens. Overall inconclusive results led bush dog samples to  
88 be submitted retrospectively to the Animal and Plant Health Agency (APHA), Virology Department  
89 for shotgun metagenomic assessment, which detected presence of influenza type A virus sequences in  
90 internal organs. We describe the disease event, timeline, virological and pathological impact of  
91 disease and sequence analysis of the causative agent.

## 92 **Methods**

### 93 *Clinical investigation, post-mortem examination, tissue sampling and histopathological analysis*

94 Clinical records including displayed signs and symptoms, blood chemistry data and mortality were  
95 recorded by the safari park personnel as part of the day-to-day activities. All bush dogs underwent full  
96 post-mortem examination (PME) at the index site, immediately after they were either euthanised or

97 found dead. Of the ten animals, six were euthanised using intracardiac pentobarbitone (0.03 mg/kg, 1  
98 mg/ml) under anaesthesia induced with medetomidine (0.03 mg/kg 1 mg/ml) and ketamine (4.03 -  
99 4.85 mg/kg, 100 mg/ml), the remainder were found dead within the enclosure. Post-mortem  
100 examination was undertaken on site at the zoological collection with multiple tissues sampled for  
101 microbial culture, molecular analysis and formalin fixation. Tissue samples were submitted by the  
102 index site for bacteriological analysis to a private laboratory, frozen tissues were stored at -18 °C in a  
103 standard chest freezer for subsequent testing as required, while other tissues were stored in 10 %  
104 formalin and submitted for histology to a private laboratory pathologist. Later, remaining formalin  
105 fixed tissue, and formalin fixed paraffin embedded tissues from the private laboratory were further  
106 submitted to the Avian Influenza National Reference Laboratory at APHA for additional investigation  
107 (Table 1). Four-micron thick serial sections were stained with haematoxylin and eosin (H&E), and for  
108 immunohistochemistry (IHC), using a mouse monoclonal anti-influenza A nucleoprotein antibody  
109 (Staten's Serum Institute, Copenhagen, Denmark) for histopathological examination and  
110 demonstration of influenza A virus nucleoprotein (NP). The overall distribution of virus-specific  
111 staining in each tissue was assessed using a semi-quantitative scoring system (where 0 = no staining,  
112 1 = minimal, 2 = mild, 3 = moderate and 4 = widespread staining) modified from (36). Specificity of  
113 immunolabelling was assessed in positive control sections by replacing the primary antibody with a  
114 matching mouse IgG isotype; no non-specific cross-linking was observed. Frozen tissues for  
115 virological analysis (Table 2) were prepared as a 10% (w/v) suspension in Leibovitz's L-15 medium  
116 and incubated at room temperature for 60 minutes before using standard RNA extraction protocols  
117 (37).

#### 118 *Environmental and epidemiological investigation.*

119 To determine the extent of index site viral contamination, environmental samples were collected from  
120 eleven locations within or surrounding the bush dog enclosure (Table 3a). These had been collected  
121 shortly after the mortality event as a possible toxic / contaminant aetiology was speculated.  
122 Four matrices were investigated including water (n=12), silt (n=2), foam (n=1) and faeces (n=3). The  
123 silt, faeces and foam samples were prepared as a 10% suspension (w/v) in 0.1M PBS pH 7.2 (made

124 locally), shaken for two minutes and incubated at room temperature for 1 hour as described previously  
125 (38). Water samples were tested without further dilution (38).

126 Due to the retrospective nature of this case, samples from animals which died following  
127 outbreak in bush dogs, and still in store at the safari park, were also collected and tested (Table 3b).  
128 These samples included: An amur tiger paw from an animal which died housed near the bush dog  
129 enclosure (fur, claw and the paw pad were swabbed for this purpose) and three tiger faecal samples;  
130 swabs of oropharyngeal and cloacal cavities from two pheasants and brain tissues harvested post-  
131 mortem from the same birds. Swabs were cut into 1mL serum-free Leibovitz's L-15 medium  
132 containing antibiotics (penicillin, streptomycin), incubated at room temperature for 10 minutes before  
133 standard viral RNA extraction. Brain tissues were prepared as a 10% (w/v) suspension in L-15  
134 medium and incubated at room temperature for 60 minutes before using standard RNA extraction  
135 protocols (37).

136 Following a positive diagnosis of HPAIV infection in dogs that developed clinical disease,  
137 samples from the 5 surviving dogs were collected in March 2023 (Table 3c), including oral and rectal  
138 swabs and blood samples for molecular and serological analysis. Sera were aspirated from clotted  
139 blood samples and heat-treated at 56°C for 30 min in a water bath. All serum samples were titrated for  
140 H5-specific antibodies by using the Haemagglutination Inhibition (HI) test against four  
141 haemagglutination units of a homologous HP H5N1 antigen. Samples with a reciprocal HI titre of 16  
142 or above were considered positive (39).

#### 143 *Virological investigation*

##### 144 *RNA extraction and Molecular Analysis*

145 RNA was extracted from the environmental, tissue and swab samples using either TRIzol (Invitrogen)  
146 or the MagMAX CORE Nucleic Acid Purification Kit (ThermoFisher Scientific) using the robotic  
147 Mechanical Lysis Module (KingFisher Flex system; Life Technologies), as per manufacturer's  
148 instructions as previously described (37). Extracted RNA was also assessed for viral nucleic acid  
149 (vRNA) using the H5 HPAIV (40) and/or NA specific (41) detection real-time RT-PCR (RRT-PCR).  
150 RRT-PCR Cq values  $\leq 36.00$  were considered as AIV positive. Samples with Cq  $>36$  were considered

151 negative. A ten-fold dilution series of titrated H5N1-21/22 HPAIV RNA was used to construct a  
152 standard curve using Agilent AriaMx software (Agilent, UK) to determine PCR efficiency which  
153 assured optimal assay performance for quantitative interpretation as previously described (37).

#### 154 *Virus isolation and propagation*

155 For each sample, 100 µl of material was added to 100 µl of phosphate buffered saline (PBS)  
156 containing a mixture of antibiotics. The sample was incubated for 1 hour, and 100 µl was inoculated  
157 into the allantoic cavity of two specific pathogen-free (SPF) 9-day-old embryonated fowls' eggs  
158 (EFE), as described previously (37). At 2 days post inoculation (dpi), the allantoic fluid of one EFE  
159 was collected and tested for the presence of a haemagglutinating agent using the haemagglutinin assay  
160 (HA) as previously described (37). If no HA activity was observed at 2 dpi, allantoic fluid from the  
161 remaining EFE was collected at 6 dpi and again tested by HA. HA activity  $>1/4$  at either 2 or 6 dpi  
162 was considered positive for virus isolation. Conversely, HA activity  $<1/4$  at both 2 and 6 dpi was  
163 considered negative for virus isolation.

#### 164 *Genomic analysis*

165 For whole-genome sequence analysis, the extracted RNA was converted to double-stranded cDNA  
166 and sequenced using either an Illumina MiSeq or NextSeq 550 as described previously (7). Initial  
167 metagenomic analysis was performed using SeqMan NGen Software 17.5 (DNASTAR, USA) and  
168 Reference-guided application using GenBank virus reference sequences as template. Assembly of the  
169 influenza A viral genomes was performed using a custom in-house pipeline as described previously  
170 (7). All influenza sequences generated (Table S1) and used in this study are available through the  
171 GISAID EpiFlu Database (<https://www.gisaid.org>). Initial analyses sought to compare the sequences  
172 obtained from the Bush dogs and associated samples with contemporary H5N1 sequences from the  
173 UK and Europe. To achieve this, all avian H5N1 clade 2.3.4.4b sequences containing all eight  
174 influenza gene segments available on the GISAID EpiFlu platform between 1 January 2020 and 17  
175 July 2023 were downloaded. Duplicate sequences were removed before all sequences were aligned on  
176 a per segment basis using MAFFT v7.520 (42). The alignments were visually inspected using  
177 AliView version 1.26 (43) and sequences which did not cover the entire open reading frame (ORF)

178 across all eight gene segments were removed. The remaining sequences were aligned and trimmed to  
179 the ORF for each segment before generating a concatenated alignment using SeqKit (44) and then  
180 used to infer maximum-likelihood phylogenetic tree using IQ-Tree version 2.2.3 (45). This resultant  
181 phylogenetic tree contained over 2,000 sequences and was therefore sub-sampled to cover 98% of the  
182 diversity within using PARNAS (46), which reduce the dataset down approximately 300 sequences  
183 whilst still containing representatives of the predominant UK genotypes. The sub-sampled dataset was  
184 then used to infer maximum-likelihood phylogenies for each gene segment using IQ-Tree along with  
185 ModelFinder (47) and 1,000 ultrafast bootstraps (48). Once the genotype of the Bush dogs and  
186 associated sequences was determined, all sequences of the relevant genotype were retrieved from the  
187 original dataset (prior to sub-sampling) and used to generate time-resolved phylogenies using  
188 TreeTime (49). Phylogenetic trees were visualised as described previously (7). Nucleotide identity  
189 between sequences was determined as described previously (50).

## 190 **Results**

### 191 *Clinical Setting*

192 The bush dogs had been clinically healthy with no significant clinical concerns in the preceding 3  
193 years. A timeline of disease status is presented in Figure 1. Case 1, day 1, male, 9-year-old bush dog  
194 was found dead adjacent to the entrance of the nest box with a CCTV review showing hindlimb  
195 ataxia, forelimb hypermetria, depression and polyuria. Case 2, day 1, male, 3-year-old was moribund  
196 and assessed under anaesthesia with uraemia, raised creatinine, hyperphosphataemia, total  
197 bilirubinaemia, and a raised alanine aminotransferase was noted, and was found dead the following  
198 morning, day 2. Case 3, day 2, 4-year-old female was found dead in the main pond within the exhibit.  
199 Case 4, day 3, a 5-year-old female was euthanised due to severe ataxia combined with depressed  
200 responsiveness and polyuria. Case 5, day 3, a 4-year-old male was euthanized due to severe ataxia  
201 combined with depressed responsiveness and polyuria. Case 6, day 4, a 9-year-old female presented  
202 with severe hind-limb ataxia, weakness, reduced activity and polyuria, and was euthanized. Case 7,  
203 day 5, a 4-year-old female appeared clinically healthy during the morning assessment but within 2



204 hours was moribund and unresponsive and was euthanized on welfare grounds. Case 8, day 5, a 3-  
205 year-old male was clinically normal at the morning assessment but within 2 hours had developed  
206 severe ataxia and generalised weakness, vocalising and was euthanized on welfare grounds. Case 9,  
207 day 6, a 1-year-old female was found dead during the morning check. Case 10, day 9, a 4-year-old  
208 male presented with severe hind limb weakness, knuckling, and ataxia, and was euthanized on welfare  
209 grounds. The remaining five animals, two males and three females, age range 18 months to 4 years  
210 were clinically normal during the same period and remained unaffected from the event.

211

212 Pathological investigation and preliminary collateral analysis were performed at private laboratories.  
213 On gross examination, the primary findings were diffuse mild to moderate hepatomegaly (8/10), with  
214 multifocal to diffuse pale tan discolouration within liver lobes (7/10) and mild to moderate ascites  
215 (7/10). Intracardiac euthanasia made gross assessment of the lungs challenging in six cases, but mild  
216 to moderate multifocal pulmonary haemorrhage was seen in three of the remaining four cases. Other  
217 less common gross findings included bilateral adrenomegaly (6/10), diffuse splenomegaly (3/10), and  
218 segmental small intestinal congestion and haemorrhage (4/10).

219 Microscopically, within many of the tissues examined, vascular changes were observed, ranging from  
220 occasional subacute multifocal moderate to marked fibrinoid necrosis of small arterioles without  
221 associated inflammation, to acute, multifocal, mild to severe necrotising and sometimes  
222 leukocytoclastic phlebitis of vessel walls, with fibrin thrombi, and necrosis of adjacent structures.  
223 In the liver, random mild to moderate acute multifocal necrosis (Figure 2a) and inflammation  
224 affecting both the parenchyma, and blood vessels and bile ducts within portal triads, was seen in all  
225 ten cases. Foci of hepatocellular necrosis were rarely surrounded by minimal neutrophilic and  
226 histiocytic inflammation.

227 Variable changes in the lungs were present in six bush dogs. The bronchioles and adjacent  
228 alveoli were predominantly involved in four cases where the bronchiolar lumina were filled with  
229 degenerate neutrophils and epithelial cells with attenuation and necrosis of bronchiolar epithelium.  
230 (Figure 2; e). Mild neutrophilic, lymphocytic and histiocytic infiltration of the lamina propria and  
231 submucosa was also seen. Adjacent to the affected airways, alveoli were variably filled with fibrin,

232 oedema, alveolar macrophages, neutrophils and erythrocytes. Less commonly, a more interstitial  
233 pattern was seen with mild to moderate expansion of the alveolar septae with macrophages,  
234 lymphocytes and neutrophils. Occasionally, vascular pathology was present, characterised by  
235 segmental infiltration of the vascular wall with leucocytes and angiocentric necrosis.

236         The brain was collected in four cases, and in all, the leptomeninges were expanded by mild to  
237 marked multifocal subacute inflammation. In three cases (7, 9 and 10), the infiltrate was composed  
238 mainly of viable and degenerate neutrophils, with rarefaction and inflammation of the adjacent  
239 neuropil (Figure 2: c). In the fourth case (6), the infiltrate consisted predominantly of lymphocytes,  
240 macrophages, and plasma cells with fewer neutrophils, and locally extensive involvement of the  
241 choroid plexus on the section examined. In all cases, randomly within the cerebral cortex and  
242 brainstem, and rarely in the cerebellum, few to multiple foci of mild to moderate necrosis and  
243 inflammation consisting mainly of aggregates of macrophages and glial cells, necrotic debris, and rare  
244 neuronal necrosis, were seen. Grey matter and white matter were both affected. In the neuropil,  
245 vascular changes were mild, and characterised by an acute multifocal vasculitis with infrequent mild  
246 histiocytic perivascular cuffing. However, in the leptomeninges, vascular lesions ranged from a mild  
247 to severe, and acute to subacute multifocal necrotising vasculitis (Figure 2: c).

248 In three cases, multifocal marked acute cortical and medullary epithelial necrosis with neutrophilic  
249 infiltration, congestion, and focal subacute severe leukocytoclastic vasculitis (Figure 2: g and h) was  
250 observed in the adrenal glands.

251         In lymph nodes examined from three bush dogs, findings varied from moderate multifocal  
252 lymphadenitis with predominantly subcapsular sinus neutrophilia and histiocytosis, and multifocal  
253 necrosis, to severe, diffuse acute lymphadenitis. Severe changes were characterised by expansion of  
254 the sinuses with viable and degenerate neutrophils, histiocytes and fewer erythrocytes, and multifocal  
255 necrosis of the cortex and paracortex with infiltration of large numbers of degenerate neutrophils.  
256 Within adjacent small blood vessels, the walls were multifocally infiltrated by degenerate neutrophils  
257 and karyorrhectic debris, and in the lumina, multifocal thrombi comprised of fibrin, macrophages and  
258 neutrophils were present.

259           The spleen was minimally affected, but in all four reported cases of mild acute splenitis,  
260 multifocal clusters of viable and degenerate neutrophils and occasionally karyorrhectic debris and  
261 histiocytes, were seen in the white pulp. Haematopoietic precursors (extramedullary haematopoiesis)  
262 and haemosiderin laden macrophages were scattered within the red pulp. No vascular changes were  
263 apparent.

264           In the intestinal sections examined, inflammation was mostly mild, multifocal, diffuse and  
265 chronic. However, in the small intestine, evidence of mild to moderate active inflammation and  
266 necrosis was noted sporadically, with crypt abscessation, and foci of necrosis and monocytic  
267 inflammation within and between the inner circular and outer longitudinal smooth muscle layers,  
268 often associated with capillaries and in the submucosal and myenteric plexuses. In one case, acute,  
269 moderate multifocal necrotising typhlitis and colitis was identified, with lymphoid depletion and mild  
270 acute multifocal vasculitis rarely present in the small vessels of the submucosa.

271           Where the eye was sampled, significant widespread and occasionally severe inflammation was found  
272 centred around vessels, with resultant anterior uveitis, optic neuritis and infrequently, retinitis.  
273 Multifocal necrotising neutrophilic inflammation of the third eyelid gland (nictitans gland) was  
274 captured in one section.

275           Interestingly, the heart (three cases) and pancreas (two cases) appeared mildly affected in the  
276 sections examined, displaying mild multifocal acute degeneration and necrosis with minimal  
277 associated inflammation. Incidental mild, chronic, multifocal interstitial inflammation was reported in  
278 the kidneys but a mild to moderate multifocal acute vasculitis was present in some sections. On the  
279 serosal surface of many abdominal organs, particularly the liver, a mild to moderate acute multifocal  
280 to diffuse fibrinous peritonitis was seen. A detailed summary of the gross and histopathology reports  
281 provided by the park owner and the local specialist laboratory is provided in the supplemental  
282 material (Supplementary Table 1).

283           The changes described were suggestive of a severe acute systemic infection, which was  
284 initially thought to be bacterial, but a viral or parasitic aetiology could not be ruled out. Collateral  
285 analysis was carried out to exclude common causes of death. Secondary or contaminant bacteria were  
286 isolated from affected organs, such as *Escherichia coli*, *Staphylococcus aureus*, *Clostridium perfringens*

287 and *Clostridium sordelli*, *Haemophilus parainfluenzae* and *Proteus* spp. Molecular tests (PCRs)  
288 performed at a private laboratory excluded presence of SARS-CoV-2, Leptospirosis, RHDV type 1  
289 and Canine Adenovirus. Toxicology analysis for Ethylene glycol were negative. Despite this further  
290 ancillary testing, no aetiologic agent was identified and preliminary clinical investigation was  
291 inconclusive.

## 292 *Immunohistochemistry*

293 Immunohistochemistry was performed using an anti-influenza A antibody targeting viral  
294 nucleoprotein, on formalin fixed paraffin embedded tissues previously submitted for routine  
295 histopathologic analysis (Table 1). Generally, infrequent viral antigen was detected in macrophages  
296 and in cellular debris within and on the periphery of necrosis and inflammation in the many affected  
297 organs. Angiocentric necrosis and inflammation was sometimes accompanied by sporadic labelling of  
298 the vessel walls, particularly the endothelium and tunica media.

299 More specifically, within organs, occasional viral antigen was present in hepatocytes (Figure  
300 2b), and in bile duct epithelium in the liver. In the brain, viral antigen was abundant in ependymal  
301 cells lining the lateral and third ventricles, and less frequently, multifocally in neurons, axons, and  
302 glial cells in the neuropil. Labelling was also present in the meningeal epithelial cells in the  
303 subarachnoid space (Figure 2: d). Moderate sporadic labelling was seen in bronchiolar epithelium  
304 (Figure 2f) but was minimally visible in the alveolar septae.

305 Significant immunolabelling was observed in acinar cells of the adrenal cortex (zona  
306 fasciculata and reticularis), and less commonly in cells of the adrenal medulla (Figure 2h). In the eye,  
307 viral antigen was detected in macrophages around vessels and within necrotic debris, particularly in  
308 the iris, uvea and meninges of the optic nerve. Moderate viral antigen was found in the acinar cells of  
309 the nictitans gland of the eye. Strong labelling was seen in the nuclei of smooth muscle cells of one or  
310 both the smooth muscle layers of the small and large intestines, but infrequently within macrophages,  
311 in the vascular endothelium of the capillaries, and in ganglion cells of the plexuses between them.  
312 Rarely, viral antigen was visible in mucosal epithelial cells of the stomach, and enterocytes in the  
313 small and large intestines. Occasional viral antigen was present in the serosal epithelium on the

314 surfaces of the intestines, abdominal organs, and urinary bladder. Minimal antigen was rarely seen in  
315 cardiomyocytes.

316

317 Virological assessment

318 Viral RNA (vRNA) was detected across a broad range of tissues sampled (Table 1) in all bush dog  
319 cases. Due to the retrospective nature of the detection, and the working practices of the team on  
320 location during the disease event, a significant number of tissues were collected at PME and these  
321 were assessed following retrospective confirmation of influenza A virus of avian origin as the  
322 causative agent. All samples tested positive across the suite of molecular tests used to detect the  
323 influenza A: M-gene, the high pathogenicity H5 haemagglutinin (H5 HP) and the N1 neuraminidase  
324 gene. Exceptions to this were oral and rectal swabs from case 6 and the intestine from case 10, all of  
325 which tested negative across all three molecular assays. Of significant interest were the positive  
326 results obtained from a urine sample that was aspirated directly from the bladder during the PME of  
327 case 5. Virus isolation and propagation was successful, resulting in the harvesting of one viral isolate  
328 per dog.

329 *Environmental and epidemiological investigation samples:*

330 During the mortality events, staff had also collected a suite of environmental samples (Table 3) from  
331 their enclosure which could be assessed for evidence of environmental contamination. An additional  
332 sample set included samples from animals at the park that were considered at risk from the agent, and  
333 which died or were euthanised during or shortly after the canid mortality event. Interestingly, from all  
334 these samples, only one sample of water taken from a drinking trough within the bush dog enclosure  
335 tested positive for viral RNA although an isolate was not successfully recovered from the sample  
336 (Table 3). Samples from the five surviving dogs, collected approximately four months after the  
337 disease event, were also negative at RRT-PCR. However, mild seroconversion was detected in 2 out  
338 of 5 dogs following HI test, demonstrating exposure to virus or viral antigen.

339

340 *Genomic analyses*

341 Initially, samples across Cases 6, 8 and 9 were subjected to metagenomic analyses; this included liver,  
342 kidney and brain samples from case 6 and three tissue pools of liver, kidney and spleen from cases 8  
343 and 9. The analysis revealed sequence reads matching those of influenza A virus. This initial  
344 metagenomic findings in combination with the RRT-PCR results prompted further investigation of the  
345 samples obtained from the Bush dogs and WGS was attempted on tissue samples or viral isolates  
346 from the deceased animals and the positive environmental sample, resulting in 11 full H5N1 HPAIV  
347 genomes being sequenced. The 11 genomes demonstrated 99.4-100% nucleotide identity to each other  
348 across all eight influenza virus gene segments. Initial phylogenetic analysis revealed that the genomes  
349 obtained from the bush dog samples clustered with those of the UK AIV09 genotype (7) (also known  
350 as the AB genotype according to the EU Reference Laboratory schema) (Figure S1), which was the  
351 predominant genotype in the UK from October until May 2023. To further investigate potential  
352 incursion routes for H5N1 into the captive Bush dog population, 10 of the 11 genomes from the safari  
353 park were concentrated and combined with a more fulsome dataset containing only genomes of the  
354 AIV09 (AB) genotype which were then used to infer time-resolved phylogenies. The omitted  
355 sequence (A/Bush dog/England/037675/2022) contained a number of gaps and was removed from

356 these subsequent analyses. From these analyses, it was demonstrated that the bush dog genomes  
357 showed high similarity with AIV09 (AB) H5N1 HPAIV sequences from the UK, but formed a distinct  
358 group (Figure 3a), with a time to most common recent ancestor (tMRCA) estimate of 24<sup>th</sup> September  
359 2022 (range: 9<sup>th</sup> September 2022 to 13<sup>th</sup> October 2022). Within this group, the 10 bush dog sequences  
360 were divided into two separate sub-groups. Sub-group A contained the environmental sequence  
361 generated from the water trough in the Bush dog enclosure (A/Environment/England/058953/2022),  
362 along with two sequences from Bush dogs (A/Bush dog/England/037682/2022 (case 3) and A/Bush  
363 dog/058954/2022 (case 10)) and were generated from samples collected from the 17<sup>th</sup> of November  
364 through to the 25<sup>th</sup> of November, covering the entire sampling period. Sub-group B contained the  
365 remaining seven Bush dog sequences, generated from samples collected between the 18<sup>th</sup> of November  
366 and 22<sup>nd</sup> November. When looking at the amino acid changes across the bush dog sequences, 10  
367 variable sites were observed across six viral proteins: polymerase basic protein 1 (PB1) and 2 (PB2),  
368 polymerase acidic protein (PA), HA, matrix protein 2 (M2) and non-structural protein 1 (NS1) (Figure  
369 3B). The PB2 protein contained the most variant sites (five), which included changes at positions 627  
370 and 701 which have both been reported to be involved in adaptation of AIVs to mammalian hosts  
371 (27). Interestingly, whilst nine of the 10 bush dog sequences, including the environmental sample,  
372 possessed a lysine (K) at position 627, one sequence (A/Bush dog/England/068984/2022 (case 4)) did  
373 not. However, this sequence did contain an asparagine (N) at position 701, whereas the other  
374 sequences possessed an aspartic acid (D). When comparing the phylogenetic and amino acid  
375 variability, it was found that sub-groups A and B were distinguished by three variable sites in the PB2  
376 (position 403 and 598) and PA (position 531) proteins. Within sub-group B, there were also three  
377 sequences (A/Bush dog/England/058198/2022, A/Bush dog/England/037689/2022 and A/Bush  
378 dog/England/037690/2022) that showed different amino acid substitution from the other sequences in  
379 sub-group B (PB2 position 123 and NS1 position 183), however, there were also other changes seen  
380 within this sub-group at different positions.

381

382 **Discussion**

383 The detection of influenza A virus of avian origin H5N1 as the causative agent of mortality in bush  
384 dogs was an unusual and unexpected event. Influenza A virus infection was not on the list of  
385 differentials for causative agent in this disease event and was initially only detected from sequence  
386 analysis following next generation sequencing of submitted samples. Sequence reads for influenza A  
387 virus led to the described diagnostic pathway that conclusively defined clade 2.3.4.4b H5N1 influenza  
388 A virus of avian origin as the cause of disease. The internal distribution of the virus demonstrated  
389 systemic and wide-spread infection affecting multiple organs and clearly demonstrate that HPAI was  
390 the primary cause of death. Viral excretion through the respiratory and intestinal tract could be  
391 speculated although swabs (oral and rectal) collected from case 6 did not detect virus. The interesting  
392 detection of HP H5N1 vRNA from case 5 from a urine sample may hint at possible horizontal  
393 transmission routes although there is no further evidence to substantiate this hypothesis as an  
394 unexpected shedding pathway for an Avian Influenza virus.

395         Histopathologic findings demonstrated a severe acute systemic disease characterised by  
396 vasculitis, and widespread necrosis and inflammation in many organs, specifically the liver, brain,  
397 lung, and adrenal glands. Immunohistochemistry confirmed the presence of viral antigen most often  
398 seen in the brain, lung, adrenal glands, lymph nodes and liver, but also within vascular walls. The  
399 brain and lung are common targets in spill over mammalian HPAI H5N1 infections (5, 51-53), with  
400 virus potentially gaining entry following inhalation into the respiratory tract. Other routes, such as  
401 infection through the intestinal barrier into the vascular system, following ingestion of infected bird  
402 carcasses have also been established as a route of H5N1 infection in cats, with subsequent viraemia  
403 (54). In these bush dogs, both lung and intestinal lesions were seen, with antigen detected in both  
404 tracts, although generally mild, supporting a multifactorial pathogenesis. Dissemination of the virus to  
405 the brain haematogenously with penetration of the blood-brain-barrier into the cerebrospinal fluid  
406 (CSF) has been proposed (55) and would account for virus detected in the meninges and spread to the  
407 adjacent neuropil. Vasculitis, and in particular, phlebitis was a significant feature of infection in this  
408 species but is infrequently described in mammalian HPAI H5N1 infection. Recent reports in red foxes  
409 (10, 51) and in historical and recent cases of HPAI H5N1 in naturally infected cats (55, 56) report  
410 endotheliotropic behaviour of the virus, with endothelial damage and vasculitis in seen in multiple



411 organs, which resembles the endotheliotropism seen in the pathogenesis of HPAI H5N1 infections in  
412 terrestrial poultry (54). However, leukocytoclastic vasculitis, defined as a small-vessel neutrophilic  
413 vasculitis with fragmented nuclei present (57) has only recently been described in naturally infected  
414 cats (56).

415         The exposure route to influenza A virus of avian origin in this case is hard to conclusively  
416 define. The bush dogs had been fed a diet that included frozen shot wild birds and game. In the  
417 absence of local disease events that may have been transferred to the bush dogs in the enclosure,  
418 infection through ingestion of infected meat / offal would appear to be the most likely route of  
419 infection. Another potential infection route is through scavenging of any wild bird carcasses/any sick  
420 wild birds landing in the un-netted pen. Other routes of infection including indirect contact (e.g., wild  
421 bird faeces) are possible but less likely and would not fit with the rapid onset of infection across a  
422 number of dogs within a short time frame. Wild bird activity was observed on the site during  
423 epidemiological investigations and black headed gulls, greylag geese, pink footed geese as well as  
424 corvids, pigeons and pheasants had been observed in the vicinity. The shot wild game supplied as  
425 food had originated from the neighbouring shooting estate but no reports of clinical signs or die-offs  
426 in avian species had been reported. Further, the stream/pond in the bush dog enclosure was supplied  
427 with water from a reservoir upstream that was frequented by wild bird species, although a sluice was  
428 in place to prevent carcasses being washed down from the reservoir and the water was relatively fast  
429 flowing, again making this an unlikely infection route. Critically, the rapid development of disease  
430 and acute clinical outcome suggests that the dogs received a high dose of infectious material and so  
431 ingestion of material must be considered the most likely route of infection. Genetic assessment from  
432 tissues positive for each animal was undertaken to try and evaluate the possibility of dog-to-dog  
433 transfer. Local atmospheric conditions are known to influence environmental virus survival with  
434 lower temperatures promoting persistence (38, 58). In early October 2022 the day-night high-low  
435 temperature range near this site was 17 to 11 °C. For samples collected on 17 to 22 November 2022  
436 and 06 March 2023, day-night readings were consistent at 8 – 11 °C and 4 – 8 °C respectively (59),  
437 hence favourable to virus survival. Other factors can impact detection of environmental viral RNA  
438 from water, dilution (rain), volume (lake) and flowrate (river) (58). This might account for a single M-

439 gene signal detection from the bush dog water trough (17/11/2022), a fixed volume container of still  
440 water (Table 3a). All bush dogs had access to the water trough which we found contained viral RNA.  
441 Since five bush dogs survived this lowers the likelihood of water being the route or main source of  
442 virus introduction and trough contamination by infected bush dogs being a plausible explanation for  
443 this vRNA detection.

444 The genetics of the virus demonstrated a high level of viral genetic homogeneity across all  
445 eight viral segments of the sequences from the bush dogs. Phylogenetic analysis demonstrated that  
446 these sequences were consistent with the AIV09 (EURL: AB) H5N1 HPAIV genotype which  
447 predominated in the UK during the 2022-2023 autumn/winter period (7). Time-resolved phylogenetic  
448 and amino acid analysis found that all the sequences from the bush dogs were the result of a single  
449 introduction, however whilst there were amino acid substitutions, these do not appear to have been  
450 consistently maintained. Taken together, this suggests that transfer between dogs is unlikely, and that  
451 a common source of infection is responsible, although it is impossible to definitively conclude  
452 whether dog-to-dog transmission occurred. Critically, of the original bush dog population within the  
453 enclosure, 5 animals survived remaining clinically normal throughout. This may indicate that these  
454 dogs had not received a dose of virus sufficient to drive a productive infection. This is further  
455 supported by low level serological responses being detected in two of the animals (cases 11 and 12)  
456 that may indicate exposure to antigen or a low-level infection that was cleared by the host immune  
457 response. From the perspective of zoonotic risk, the well-established marker of mammalian adaptation  
458 (E627K) was detected in all but one of the bush dog sequences generated. This mutation alone is  
459 insufficient to drive an increase in zoonotic risk and so the risk to human populations must be  
460 considered very low.

461 Infection of unusual species with influenza A of avian origin H5N1 raises important questions  
462 about the potential implications for infection of conservation species. Clearly, the increasing detection  
463 of mammalian infection with these viruses is of global interest, not least through the potential for  
464 mammalian adaptation and establishment of mammal-to-mammal transmission. This factor is being  
465 monitored globally wherever mammalian infection is detected, and potential adaptive mutations  
466 scored for relevance to potential viral adaptation. Critically, understanding the implications of

467 infection of captive, potentially rare or endangered species is key to enabling prevention of such  
468 occurrences. Clearly the feeding of wild shot birds to captive carnivores whilst infection pressure is  
469 high in wild birds should be discouraged in line with similar recommendations given to keepers of  
470 birds of prey or in alternative a rigorous risk assessment should be carried out before any carcass is  
471 fed to any of these animals.

## 472 **Acknowledgements**

473 MF, SMR, AMPB, SMR, NM, CJW, SST, JJ and ACB were part funded by the UK Department for  
474 the Environment, Food and Rural Affairs (Defra) and the devolved Scottish and Welsh governments  
475 under grants SE2213, SE2227, SV3400 and SV3006. ACB and JJ were also part funded by the Biotechnology  
476 and Biological Sciences Research Council (BBSRC) and Department for Environment, Food and  
477 Rural Affairs (Defra, UK) research initiatives ‘FluMAP’ [grant number BB/X006204/1] and  
478 ‘FluTrailMap’ [grant number BB/Y007271/1], and the Medical Research Council (MRC) and Defra  
479 research initiative ‘FluTrailMap-One Health’ [grant number MR/Y03368X/1] as well as by Federal  
480 funds from the National Institute of Allergy and Infectious Diseases, National Institutes of Health,  
481 Department of Health and Human Services (USA), under contract no. 75N93021C00015. This  
482 investigation was also partly funded by APHA GAP-DC SE0565 project. We thank the scientific and  
483 support staff of the Pathology and Virology departments of APHA Weybridge and of the Surveillance  
484 and Laboratory Services department of the APHA Veterinary Investigation Centres. We acknowledge  
485 the authors, originating and submitting laboratories of the sequences from GISAID’s EpiFlu Database  
486 on which this research is based, Veterinary Pathology Group and PALS for their histopathology  
487 expertise in initial reporting, and analyses described in text. All submitters of the data may be  
488 contacted directly via the GISAID website ([www.gisaid.org](http://www.gisaid.org)).

489

490 **References**

- 491 1. Adlhoch C, Gossner C, Koch G, Brown I, Bouwstra R, Verdonck F, et al. Comparing  
492 introduction to Europe of highly pathogenic avian influenza viruses A(H5N8) in 2014 and A(H5N1)  
493 in 2005. *Euro surveillance : bulletin Europeen sur les maladies transmissibles = European*  
494 *communicable disease bulletin*. 2014 Dec 18;19(50):20996.
- 495 2. Seekings AH, Warren CJ, Thomas SS, Mahmood S, James J, Byrne AMP, et al. Highly  
496 pathogenic avian influenza virus H5N6 (clade 2.3.4.4b) has a preferable host tropism for waterfowl  
497 reflected in its inefficient transmission to terrestrial poultry. *Virology*. 2021 2021/07/01/;559:74-85.
- 498 3. Adlhoch C, Fusaro A, Gonzales JL, Kuiken T, Marangon S, Niqueux É, et al. Avian influenza  
499 overview February - May 2021. *EFSA journal European Food Safety Authority*. 2021  
500 Dec;19(12):e06951.
- 501 4. The Animal and Plant Health Agency (APHA). Updated Outbreak Assessment #34: The  
502 Animal and Plant Health Agency; 2022.
- 503 5. Floyd T, Banyard AC, Lean FZX, Byrne AMP, Fullick E, Whittard E, et al. Encephalitis and  
504 Death in Wild Mammals at a Rehabilitation Center after Infection with Highly Pathogenic Avian  
505 Influenza A(H5N8) Virus, United Kingdom. *Emerging infectious diseases*. 2021 Nov;27(11):2856-63.
- 506 6. Shin DL, Siebert U, Lakemeyer J, Grilo M, Pawliczka I, Wu NH, et al. Highly Pathogenic  
507 Avian Influenza A(H5N8) Virus in Gray Seals, Baltic Sea. *Emerging infectious diseases*. 2019  
508 Dec;25(12):2295-8.
- 509 7. Byrne AMP, James J, Mollett BC, Meyer SM, Lewis T, Czepiel M, et al. Investigating the  
510 Genetic Diversity of H5 Avian Influenza Viruses in the United Kingdom from 2020-2022.  
511 *Microbiology spectrum*. 2023 Aug 17;11(4):e0477622.
- 512 8. Banyard AC, Lean FZX, Robinson C, Howie F, Tyler G, Nisbet C, et al. Detection of Highly  
513 Pathogenic Avian Influenza Virus H5N1 Clade 2.3.4.4b in Great Skuas: A Species of Conservation  
514 Concern in Great Britain. *Viruses*. 2022;14(2):212.
- 515 9. European Food Safety Authority ECfDP, Control EURLfAI, Adlhoch C, Fusaro A, Gonzales  
516 JL, Kuiken T, et al. Avian influenza overview March – April 2023. *EFSA Journal*.  
517 2023;21(6):e08039.
- 518 10. Rijks JM, Hesselink H, Lollinga P, Wesselman R, Prins P, Weesendorp E, et al. Highly  
519 Pathogenic Avian Influenza A(H5N1) Virus in Wild Red Foxes, the Netherlands, 2021. *Emerging*  
520 *infectious diseases*. 2021 Nov;27(11):2960-2.
- 521 11. Adlhoch C, Fusaro A, Gonzales JL, Kuiken T, Marangon S, Niqueux É, et al. Avian influenza  
522 overview March - June 2022. *EFSA journal European Food Safety Authority*. 2022  
523 Apr;20(64):e07415.
- 524 12. Postel A, King J, Kaiser FK, Kennedy J, Lombardo MS, Reineking W, et al. Infections with  
525 highly pathogenic avian influenza A virus (HPAIV) H5N8 in harbor seals at the German North Sea  
526 coast, 2021. *Emerging Microbes & Infections*. 2022 2022/12/31;11(1):725-9.
- 527 13. Puryear W, Sawatzki K, Hill N, Foss A, Stone JJ, Doughty L, et al. Outbreak of Highly  
528 Pathogenic Avian Influenza H5N1 in New England Seals. *bioRxiv*. 2022:2022.07.29.501155.
- 529 14. ProMED. AVIAN INFLUENZA (49): EUROPE (DENMARK) SEAL, HPAI H5N8, 2021.  
530 2022 [cited; Available from: <https://promedmail.org/promed-post/?id=8701556>
- 531 15. OIE-WAHIS. (IN\_153005) Immediate notification: Highly pathogenic influenza A viruses  
532 (Inf. with)(non-poultry including wild birds)(2017-), Estonia. 2021 [cited; Available from:  
533 <https://wahis.oie.int/#/report-info?reportId=44804>
- 534 16. Wageningen Bioveterinary Research (WBVR). Bird flu (H5N1) detected in a fox with  
535 neurological symptoms. 2022 [cited; Available from: [https://www.wur.nl/en/news-wur/show-](https://www.wur.nl/en/news-wur/show-home/Bird-flu-H5N1-detected-in-a-fox-with-neurological-symptoms.htm)  
536 [home/Bird-flu-H5N1-detected-in-a-fox-with-neurological-symptoms.htm](https://www.wur.nl/en/news-wur/show-home/Bird-flu-H5N1-detected-in-a-fox-with-neurological-symptoms.htm)
- 537 17. Dutch Wildlife Health Centre. Polecat and foxes infected with bird flu. 2022 [cited;  
538 Available from: <https://dwhc.nl/bunzing-en-vossen-besmet-met-vogelgriep/>
- 539 18. OIE-WAHIS. (IN\_154085) Immediate notification: Influenza A viruses of high pathogenicity  
540 (Inf. with) (non-poultry including wild birds) (2017-), Ireland. 2022 [cited; Available from:  
541 <https://wahis.oie.int/#/report-info?reportId=48686>

- 542 19. Centers for Disease Control and Prevention. Technical Report: Highly Pathogenic Avian  
543 Influenza A(H5N1) Viruses. 2023.
- 544 20. Gamarra-Toledo V, Plaza PI, Gutiérrez R, Inga-Diaz G, Saravia-Guevara P, Pereyra-Meza O,  
545 et al. Mass Mortality of Marine Mammals Associated to Highly Pathogenic Influenza Virus (H5N1)  
546 in South America. *bioRxiv*. 2023:2023.02.08.527769.
- 547 21. Puryear W, Sawatzki K, Hill N, Foss A, Stone JJ, Doughty L, et al. Highly Pathogenic Avian  
548 Influenza A(H5N1) Virus Outbreak in New England Seals, United States. *Emerging infectious*  
549 *diseases*. 2023 Apr;29(4):786-91.
- 550 22. Agüero M, Monne I, Sánchez A, Zecchin B, Fusaro A, Ruano MJ, et al. Highly pathogenic  
551 avian influenza A(H5N1) virus infection in farmed minks, Spain, October 2022. *Eurosurveillance*.  
552 2023;28(3):2300001.
- 553 23. Tammiranta N, Isomursu M, Fusaro A, Nylund M, Nokireki T, Giussani E, et al. Highly  
554 pathogenic avian influenza A (H5N1) virus infections in wild carnivores connected to mass  
555 mortalities of pheasants in Finland. *Infection, Genetics and Evolution*. 2023 2023/07/01;111:105423.
- 556 24. Rabalski L, Milewska A, Pohlmann A, Gackowska K, Lepionka T, Szczepaniak K, et al.  
557 Emergence and potential transmission route of avian influenza A (H5N1) virus in domestic cats in  
558 Poland, June 2023. *Euro surveillance : bulletin Europeen sur les maladies transmissibles = European*  
559 *communicable disease bulletin*. 2023 Aug;28(31).
- 560 25. Domańska-Blicharz K, Świętoń E, Świątalska A, Monne I, Fusaro A, Tarasiuk K, et al.  
561 Outbreak of highly pathogenic avian influenza A(H5N1) clade 2.3.4.4b virus in cats, Poland, June to  
562 July 2023. *Euro surveillance : bulletin Europeen sur les maladies transmissibles = European*  
563 *communicable disease bulletin*. 2023 Aug;28(31).
- 564 26. Reuters. South Korea detects H5N1 bird flu in two cats at shelter. 2023 [cited 2023 24th  
565 August]; Available from: [https://www.reuters.com/business/healthcare-pharmaceuticals/south-korea-](https://www.reuters.com/business/healthcare-pharmaceuticals/south-korea-detects-h5n1-bird-flu-two-cats-shelter-2023-07-26/)  
566 [detects-h5n1-bird-flu-two-cats-shelter-2023-07-26/](https://www.reuters.com/business/healthcare-pharmaceuticals/south-korea-detects-h5n1-bird-flu-two-cats-shelter-2023-07-26/)
- 567 27. Suttie A, Deng YM, Greenhill AR, Dussart P, Horwood PF, Karlsson EA. Inventory of  
568 molecular markers affecting biological characteristics of avian influenza A viruses. *Virus genes*. 2019  
569 Dec;55(6):739-68.
- 570 28. Oliver I, Roberts J, Brown CS, Byrne AM, Mellon D, Hansen RD, et al. A case of avian  
571 influenza A(H5N1) in England, January 2022. *Eurosurveillance*. 2022;27(5):2200061.
- 572 29. World Health Organization. Disease Outbreak News; Avian Influenza A (H5N1) - United  
573 States of America. 2022 [cited 2023 25th August]; Available from:  
574 <https://www.who.int/emergencies/disease-outbreak-news/item/2022-DON379>
- 575 30. World Health Organization. Disease Outbreak News; Avian Influenza A (H5N1) - Spain.  
576 2022 [cited 2023 25th August]; Available from: [https://www.who.int/emergencies/disease-outbreak-](https://www.who.int/emergencies/disease-outbreak-news/item/2022-DON420#:~:text=On%2027%20September%202022%2C%20the,in%20the%20province%20of%20Guadalajara.)  
577 [news/item/2022-](https://www.who.int/emergencies/disease-outbreak-news/item/2022-DON420#:~:text=On%2027%20September%202022%2C%20the,in%20the%20province%20of%20Guadalajara.)  
578 [DON420#:~:text=On%2027%20September%202022%2C%20the,in%20the%20province%20of%20G](https://www.who.int/emergencies/disease-outbreak-news/item/2022-DON420#:~:text=On%2027%20September%202022%2C%20the,in%20the%20province%20of%20Guadalajara.)  
579 [uadalajara.](https://www.who.int/emergencies/disease-outbreak-news/item/2022-DON420#:~:text=On%2027%20September%202022%2C%20the,in%20the%20province%20of%20Guadalajara.)
- 580 31. World Health Organization. Influenza at the human-animal interface summary and  
581 assessment, 11 November 2022. 2022 [cited 2023 25th August]; Available from:  
582 [https://www.who.int/publications/m/item/influenza-at-the-human-animal-interface-summary-and-](https://www.who.int/publications/m/item/influenza-at-the-human-animal-interface-summary-and-assessment-11-nov-2022)  
583 [assessment-11-nov-2022](https://www.who.int/publications/m/item/influenza-at-the-human-animal-interface-summary-and-assessment-11-nov-2022)
- 584 32. World Health Organization. Disease Outbreak News; Human infection caused by avian  
585 influenza A(H5) - Ecuador. 2023 [cited 2023 25th August]; Available from:  
586 <https://www.who.int/emergencies/disease-outbreak-news/item/2023-DON434>
- 587 33. World Health Organization. Disease Outbreak News; Human infection caused by Avian  
588 Influenza A (H5) - Chile. 2023 [cited 2023 25th August]; Available from:  
589 <https://www.who.int/emergencies/disease-outbreak-news/item/2023-DON453>
- 590 34. UK Government. Investigation into the risk to human health of avian influenza (influenza A  
591 H5N1) in England. 2023 [cited 2023 25th August]; Available from:  
592 [https://www.gov.uk/government/publications/avian-influenza-influenza-a-h5n1-technical-](https://www.gov.uk/government/publications/avian-influenza-influenza-a-h5n1-technical-briefings/investigation-into-the-risk-to-human-health-of-avian-influenza-influenza-a-h5n1-in-england-technical-briefing-5)  
593 [briefings/investigation-into-the-risk-to-human-health-of-avian-influenza-influenza-a-h5n1-in-](https://www.gov.uk/government/publications/avian-influenza-influenza-a-h5n1-technical-briefings/investigation-into-the-risk-to-human-health-of-avian-influenza-influenza-a-h5n1-in-england-technical-briefing-5)  
594 [england-technical-briefing-5](https://www.gov.uk/government/publications/avian-influenza-influenza-a-h5n1-technical-briefings/investigation-into-the-risk-to-human-health-of-avian-influenza-influenza-a-h5n1-in-england-technical-briefing-5)

- 595 35. Tiepolo LM, Quadros J, Pitman MR. A review of bush dog *Speothos venaticus* (Lund, 1842)  
596 (Carnivora, Canidae) occurrences in Paraná state, subtropical Brazil. *Braz J Biol.* 2016 Jun;76(2):444-  
597 9.
- 598 36. Löndt BZ, Nunez A, Banks J, Nili H, Johnson LK, Alexander DJ. Pathogenesis of highly  
599 pathogenic avian influenza A/turkey/Turkey/1/2005 H5N1 in Pekin ducks (*Anas platyrhynchos*)  
600 infected experimentally. *Avian Pathol.* 2008 Dec;37(6):619-27.
- 601 37. James J, Billington E, Warren CJ, De Sliva D, Di Genova C, Airey M, et al. Clade 2.3.4.4b  
602 H5N1 high pathogenicity avian influenza virus (HPAIV) from the 2021/22 epizootic is highly duck  
603 adapted and poorly adapted to chickens. *Journal of General Virology.* 2023;104(5).
- 604 38. James J, Warren CJ, De Silva D, Lewis T, Grace K, Reid SM, et al. The Role of Airborne  
605 Particles in the Epidemiology of Clade 2.3.4.4b H5N1 High Pathogenicity Avian Influenza Virus in  
606 Commercial Poultry Production Units. *Viruses.* 2023;15(4):1002.
- 607 39. World Organisation for Animal Health (WOAH). *Terrestrial Manual: Chapter 3.3.4. Avian  
608 Influenza (Including infection with High Pathogenicity Avian Influenza Viruses); 2021.*
- 609 40. James J, Seekings AH, Skinner P, Purchase K, Mahmood S, Brown IH, et al. Rapid and  
610 sensitive detection of high pathogenicity Eurasian clade 2.3.4.4b avian influenza viruses in wild birds  
611 and poultry. *Journal of virological methods.* 2022 Mar;301:114454.
- 612 41. James J, Slomka MJ, Reid SM, Thomas SS, Mahmood S, Byrne AMP, et al. Development  
613 and Application of Real-Time PCR Assays for Specific Detection of Contemporary Avian Influenza  
614 Virus Subtypes N5, N6, N7, N8, and N9. *Avian Diseases.* 2018;63(sp1):209-18, 10.
- 615 42. Katoh K, Standley DM. MAFFT multiple sequence alignment software version 7:  
616 improvements in performance and usability. *Mol Biol Evol.* 2013 Apr;30(4):772-80.
- 617 43. Larsson A. AliView: a fast and lightweight alignment viewer and editor for large datasets.  
618 *Bioinformatics.* 2014;30(22):3276-8.
- 619 44. Shen W, Le S, Li Y, Hu F. SeqKit: A Cross-Platform and Ultrafast Toolkit for FASTA/Q File  
620 Manipulation. *PLOS ONE.* 2016;11(10):e0163962.
- 621 45. Minh BQ, Schmidt HA, Chernomor O, Schrempf D, Woodhams MD, von Haeseler A, et al.  
622 IQ-TREE 2: New Models and Efficient Methods for Phylogenetic Inference in the Genomic Era.  
623 *Molecular Biology and Evolution.* 2020;37(5):1530-4.
- 624 46. Markin A, Wagle S, Grover S, Vincent Baker AL, Eulenstein O, Anderson TK. PARNAS:  
625 Objectively Selecting the Most Representative Taxa on a Phylogeny. *Systematic Biology.*  
626 2023;72(5):1052-63.
- 627 47. Kalyanamoorthy S, Minh BQ, Wong TKF, von Haeseler A, Jermin LS. ModelFinder: fast  
628 model selection for accurate phylogenetic estimates. *Nat Methods.* 2017 Jun;14(6):587-9.
- 629 48. Hoang DT, Chernomor O, von Haeseler A, Minh BQ, Vinh LS. UFBoot2: Improving the  
630 Ultrafast Bootstrap Approximation. *Mol Biol Evol.* 2018 Feb 1;35(2):518-22.
- 631 49. Sagulenko P, Puller V, Neher RA. TreeTime: Maximum-likelihood phylodynamic analysis.  
632 *Virus Evol.* 2018 Jan;4(1):vex042.
- 633 50. Lean FZX, Leblond AL, Byrne AMP, Mollett B, James J, Watson S, et al. Subclinical  
634 hepatitis E virus infection in laboratory ferrets in the UK. *The Journal of general virology.* 2022  
635 Nov;103(11).
- 636 51. Bordes L, Vreman S, Heutink R, Roose M, Venema S, Pritz-Verschuren SBE, et al. Highly  
637 Pathogenic Avian Influenza H5N1 Virus Infections in Wild Red Foxes (*Vulpes vulpes*) Show  
638 Neurotropism and Adaptive Virus Mutations. *Microbiology spectrum.* 2023 Feb 14;11(1):e0286722.
- 639 52. Lagan P, McKenna R, Baleed S, Hanna B, Barley J, McConnell S, et al. Highly pathogenic  
640 avian influenza A(H5N1) virus infection in foxes with PB2-M535I identified as a novel mammalian  
641 adaptation, Northern Ireland, July 2023. *Eurosurveillance.* 2023;28(42):2300526.
- 642 53. Cronk BD, Caserta LC, Laverack M, Gerdes RS, Hynes K, Hopf CR, et al. Infection and  
643 tissue distribution of highly pathogenic avian influenza A type H5N1 (clade 2.3.4.4b) in red fox kits  
644 (*Vulpes vulpes*). *Emerg Microbes Infect.* 2023 Dec;12(2):2249554.
- 645 54. Reperant LA, van de Bildt MW, van Amerongen G, Leijten LM, Watson S, Palser A, et al.  
646 Marked endotheliotropism of highly pathogenic avian influenza virus H5N1 following intestinal  
647 inoculation in cats. *J Virol.* 2012 Jan;86(2):1158-65.

- 648 55. Songserm T, Amonsin A, Jam-on R, Sae-Heng N, Meemak N, Pariyothorn N, et al. Avian  
649 influenza H5N1 in naturally infected domestic cat. *Emerging infectious diseases*. 2006 Apr;12(4):681-  
650 3.
- 651 56. Sillman SJ, Drozd M, Loy D, Harris SP. Naturally occurring highly pathogenic avian  
652 influenza virus H5N1 clade 2.3.4.4b infection in three domestic cats in North America during 2023. *J*  
653 *Comp Pathol*. 2023 Aug;205:17-23.
- 654 57. Maxie MG. Jubb, Kennedy & Palmer's Pathology of Domestic Animals. Oxford: W.B.  
655 Saunders; 2015.
- 656 58. Furness RW, Gear SC, Camphuysen KCJ, Tyler G, de Silva D, Warren CJ, et al.  
657 Environmental Samples Test Negative for Avian Influenza Virus H5N1 Four Months after Mass  
658 Mortality at A Seabird Colony. *Pathogens*. 2023;12(4):584.
- 659 59. Time and Date. Past Weather in Liverpool, England, United Kingdom — November 2022.  
660 2024 [cited 2024 16/02/2024]; Available from:  
661 <https://www.timeanddate.com/weather/uk/liverpool/historic?month=11&year=2022>  
662
- 663

664  
665

**Table 1: Immunohistochemistry findings in ten bush dogs infected with HPAI H5N1**

| Tissue         | Labelling Summary | No of Bush dogs | Cell types and Strength of labelling (+ to +++)                                                                                                     | Bush dogs affected. (Case number) |
|----------------|-------------------|-----------------|-----------------------------------------------------------------------------------------------------------------------------------------------------|-----------------------------------|
| Cerebrum       | ++                | 5/10            | Neurons (+), glial cells (++) , ependymal cells (+++), meninges (++)                                                                                | 1, 6, 8, 9, 10                    |
| Cerebellum     | ++                | 3/10            | Granule cells (++) , Purkinje cells (+), glial cells (++) , meninges (++) , choroid plexus (++)                                                     | 1, 6, 9                           |
| Brainstem      | +++               | 1/10            | Neurons (+++), glial cells (++) , ependymal cells (+), endothelium (+)                                                                              | 6                                 |
| Eye            | ++                | 3/10            | Macrophages (++) , uveal smooth muscle (++) , vascular wall* (cornea, uvea, choroid, optic nerve) (+).<br>Nictitans glandular epithelium +++ (1/10) | 3, 6<br>4                         |
| Lungs          | ++                | 6/10            | Bronchiolar epithelium (++) , macrophages (+), rare type 1 pneumocytes (+)                                                                          | 3, 4, 6, 7, 8, 9                  |
| Heart          | +                 | 2/10            | Cardiomyocytes (+), endothelium (+), macrophages (+)                                                                                                | 3, 9                              |
| Liver          | +                 | 6/10            | Hepatocytes (+), bile duct epithelium (++) , macrophages (+), endothelium (+), serosal cells (+)                                                    | 2, 3, 6, 7, 8, 9                  |
| Spleen         | +                 | 3/10            | Macrophages (+), smooth muscle cells (+), serosal cells                                                                                             | 7, 8, 9                           |
| Lymph Nodes    | ++                | 3/10            | Macrophages (++) , smooth muscle cells (+), rare serosal cells (+), vascular wall*(++)                                                              | 2, 3, 9                           |
| Kidneys        | +                 | 3/10            | Vascular endothelium, tunica media (++) , macrophages (+), smooth muscle capsule (++)                                                               | 2, 3, 9                           |
| Adrenal Glands | +++               | 2/10            | Acinar epithelium (+++), macrophages (+)                                                                                                            | 3, 5                              |
| Pancreas       | +                 | 2/10            | Acinar epithelium (+), macrophages (+), endothelium (+)                                                                                             | 5, 9                              |
| Intestines     | +                 | 2/10            | Smooth muscle (++) , macrophages (+), endothelium (+), neuronal cell body (+)                                                                       | 2, 9                              |

666  
667

\*Vascular wall includes endothelium and/or tunica media

668



**Table 2:** Molecular assessment of post-mortem samples received for retrospective testing

| Case No. | Sample type   | Sampling date | Real-time RT-PCR |       |     | Whole Genome Sequence (GISAID reference) |                  |
|----------|---------------|---------------|------------------|-------|-----|------------------------------------------|------------------|
|          |               |               | M-gene           | HP H5 | N1  | Animal ID/Source                         | Accession Number |
| 1        | Liver         | 17th Nov 2022 | +                | +     | +   | /                                        | /                |
| 1        | Kidney        | 17th Nov 2022 | +                | +     | +   | /                                        | /                |
| 1        | Lung          | 17th Nov 2022 | +                | +     | +   | A/Bush<br>dog/England/037675/2022        | EPI_ISL_17360134 |
| 1        | Spleen        | 17th Nov 2022 | +                | +     | +   | /                                        | /                |
| 2        | Ascitic fluid | 18th Nov 2022 | +                | +     | +   | A/Bush<br>dog/England/037680/2022        | EPI_ISL_17257532 |
| 2        | Viscera       | 18th Nov 2022 | +                | +     | +   | /                                        | /                |
| 3        | Ascitic fluid | 18th Nov 2022 | +                | +     | +   | A/Bush<br>dog/England/037682/2022        | EPI_ISL_17257533 |
| 3        | Intestine     | 18th Nov 2022 | +                | +     | +   | /                                        | /                |
| 4        | Ascitic fluid | 19th Nov 2022 | +                | +     | +   | A/Bush<br>dog/England/037684/2022        | EPI_ISL_17257534 |
| 4        | Intestine     | 19th Nov 2022 | +                | +     | +   | /                                        | /                |
| 4        | Liver         | 19th Nov 2022 | +                | +     | +   | /                                        | /                |
| 5        | Ascitic fluid | 19th Nov 2022 | +                | +     | +   | /                                        | /                |
| 5        | Intestine     | 19th Nov 2022 | +                | +     | +   | /                                        | /                |
| 5        | Kidney        | 19th Nov 2022 | +                | +     | +   | /                                        | /                |
| 5        | Liver         | 19th Nov 2022 | +                | +     | +   | /                                        | /                |
| 5        | Urine         | 19th Nov 2022 | +                | +     | +   | A/Bush<br>dog/England/068984/2022        | EPI_ISL_17710037 |
| 6        | Brain         | 20th Nov 2022 | +                | +     | +   | A/Bush<br>dog/England/058198/2022        | EPI_ISL_17521050 |
| 6        | Intestine     | 20th Nov 2022 | +                | +     | +   | /                                        | /                |
| 6        | Kidney        | 20th Nov 2022 | +                | +     | +   | /                                        | /                |
| 6        | Liver         | 20th Nov 2022 | +                | +     | +   | /                                        | /                |
| 6        | Lung          | 20th Nov 2022 | +                | +     | +   | /                                        | /                |
| 6        | Oral swab     | 20th Nov 2022 | NEG              | NEG   | NEG | /                                        | /                |

|    |               |               |     |     |     |                                   |                  |
|----|---------------|---------------|-----|-----|-----|-----------------------------------|------------------|
| 6  | Rectal swab   | 20th Nov 2022 | NEG | NEG | NEG | /                                 | /                |
| 7  | Intestine     | 21st Nov 2022 | +   | +   | +   | A/Bush<br>dog/England/037689/2022 | EPI_ISL_17257535 |
| 7  | Kidney        | 21st Nov 2022 | +   | +   | +   | /                                 | /                |
| 7  | Liver         | 21st Nov 2022 | +   | +   | +   | /                                 | /                |
| 8  | Intestine     | 21st Nov 2022 | +   | +   | +   | A/Bush<br>dog/England/037690/2022 | EPI_ISL_17257536 |
| 8  | Kidney        | 21st Nov 2022 | +   | +   | +   | /                                 | /                |
| 8  | Liver         | 21st Nov 2022 | +   | +   | +   | /                                 | /                |
| 8  | Spleen        | 21st Nov 2022 | +   | +   | +   | /                                 | /                |
| 9  | Ascitic fluid | 22nd Nov 2022 | +   | +   | +   | /                                 | /                |
| 9  | Brain         | 22nd Nov 2022 | +   | +   | +   | /                                 | /                |
| 9  | Intestine     | 22nd Nov 2022 | +   | +   | +   | /                                 | /                |
| 9  | Kidney        | 22nd Nov 2022 | +   | +   | +   | /                                 | /                |
| 9  | Liver         | 22nd Nov 2022 | +   | +   | +   | /                                 | /                |
| 9  | Lung          | 22nd Nov 2022 | +   | +   | +   | /                                 | /                |
| 9  | Pleura        | 22nd Nov 2022 | +   | +   | +   | A/Bush<br>dog/England/037691/2022 | EPI_ISL_17257537 |
| 9  | Spleen        | 22nd Nov 2022 | +   | +   | +   | /                                 | /                |
| 9  | Stomach swab  | 22nd Nov 2022 | +   | +   | +   | /                                 | /                |
| 9  | Tonsil        | 22nd Nov 2022 | +   | +   | +   | /                                 | /                |
| 10 | Heart         | 25th Nov 2022 | NEG | NEG | NEG | /                                 | /                |
| 10 | Intestine     | 25th Nov 2022 | +   | +   | +   | A/Bush<br>dog/England/058954/2022 | EPI_ISL_17521048 |
| 10 | Liver         | 25th Nov 2022 | NEG | NEG | NEG | /                                 | /                |
| 10 | Lung          | 25th Nov 2022 | NEG | NEG | NEG | /                                 | /                |
| 10 | Stomach       | 25th Nov 2022 | NEG | NEG | NEG | /                                 | /                |
| 10 | Traches       | 25th Nov 2022 | NEG | NEG | NEG | /                                 | /                |

Legend. +: positive RRT-PCR result; NEG: negative RRT-PCR result; /: no data available.

**Table 3:** (a) Molecular assessment of enclosure environmental samples taken during the mortality event in bush dogs. (b) Molecular assessment of non-bush dog species taken during the mortality event in bush dogs. (c) Molecular and serological assessment of samples taken from surviving bush dogs.

| (a) Sample type          | Sampling date      | Real-time RT-PCR |       |     | Whole Genome Sequence (GISAID reference) |                  |
|--------------------------|--------------------|------------------|-------|-----|------------------------------------------|------------------|
|                          |                    | M-gene           | HP H5 | N1  | Animal ID/Source                         | Accession Number |
| Bush dog water trough    | 17th Nov 2022      | +                | +     | +   | A/Bush dog/England/058953/2022           | EPI_ISL_17521026 |
| Bush dog pond water      | 19th Nov 2022      | NEG              | NEG   | NEG | /                                        | /                |
| Bush dog pond silt       | 19th Nov 2022      | NEG              | NEG   | NEG | /                                        | /                |
| Top car park water       | 21st Nov 2022      | NEG              | NEG   | NEG | /                                        | /                |
| Electric Generator water | 21st Nov 2022      | NEG              | NEG   | NEG | /                                        | /                |
| Heat Generator water     | 21st Nov 2022      | NEG              | NEG   | NEG | /                                        | /                |
| Bottom toilet, run off   | 21st Nov 2022      | NEG              | NEG   | NEG | /                                        | /                |
| Top toilet, run off      | 21st Nov 2022      | NEG              | NEG   | NEG | /                                        | /                |
| Bush dog pond water      | 22nd Nov 2022      | NEG              | NEG   | NEG | /                                        | /                |
| Bridge drain water       | 22nd Nov 2022      | NEG              | NEG   | NEG | /                                        | /                |
| Sluice drain water       | 22nd Nov 2022      | NEG              | NEG   | NEG | /                                        | /                |
| Top pond foam            | 22nd Nov 2022      | NEG              | NEG   | NEG | /                                        | /                |
| Inflow pond water        | 22nd Nov 2022      | NEG              | NEG   | NEG | /                                        | /                |
| Bush dog pond silt       | 22nd Nov 2022      | NEG              | NEG   | NEG | /                                        | /                |
| Bush dog pond water      | 06th Mar 2023      | NEG              | NEG   | NEG | /                                        | /                |
| Bush dog faeces          | 19th-22nd Nov 2022 | NEG              | NEG   | NEG | /                                        | /                |
| Tiger faeces 1           | 06th Oct 2022      | NEG              | NEG   | NEG | /                                        | /                |
| Tiger faeces 2           | 06th Nov 2022      | NEG              | NEG   | NEG | /                                        | /                |
| Tiger faeces 3           | 11th Nov 2022      | NEG              | NEG   | NEG | /                                        | /                |

  

| (b) Sample type | Sampling date | Real-time RT-PCR |       |    |
|-----------------|---------------|------------------|-------|----|
|                 |               | M-gene           | HP H5 | N1 |

|                        |                |     |     |     |
|------------------------|----------------|-----|-----|-----|
| Barnacle goose viscera | 08th July 2022 | NEG | NEG | NEG |
| Tiger paw 1 fur        | Nov-22*        | NEG | NEG | NEG |
| Tiger paw 2 claw       | Nov-22*        | NEG | NEG | NEG |
| Tiger paw 3 pad        | Nov-22*        | NEG | NEG | NEG |
| Pheasant 1 OP          | Nov-22*        | NEG | NEG | NEG |
| Pheasant 1 C           | Nov-22*        | NEG | NEG | NEG |
| Pheasant 1 Brain       | Nov-22*        | NEG | NEG | NEG |
| Pheasant 2 OP          | Nov-22*        | NEG | NEG | NEG |
| Pheasant 2 C           | Nov-22*        | NEG | NEG | NEG |
| Pheasant 2 Brain       | Nov-22*        | NEG | NEG | NEG |

| Case Number | Sample type | Sampling date   | Real-time RT-PCR |       |     | HP H5N1 HI test |
|-------------|-------------|-----------------|------------------|-------|-----|-----------------|
|             |             |                 | M-gene           | HP H5 | N1  |                 |
| 11          | Oral swab   | 06th March 2023 | NEG              | NEG   | NEG | + (1:16 titre)  |
|             | Rectal swab | 06th March 2023 | NEG              | NEG   | NEG |                 |
| 12          | Oral swab   | 06th March 2023 | NEG              | NEG   | NEG | + (1:32 titre)  |
|             | Rectal swab | 06th March 2023 | NEG              | NEG   | NEG |                 |
| 13          | Oral swab   | 06th March 2023 | NEG              | NEG   | NEG | NEG             |
|             | Rectal swab | 06th March 2023 | NEG              | NEG   | NEG |                 |
| 14          | Oral swab   | 06th March 2023 | NEG              | NEG   | NEG | NEG             |
|             | Rectal swab | 06th March 2023 | NEG              | NEG   | NEG |                 |
| 15          | Oral swab   | 06th March 2023 | NEG              | NEG   | NEG | NEG             |

|             |                    |     |     |     |
|-------------|--------------------|-----|-----|-----|
| Rectal swab | 06th March<br>2023 | NEG | NEG | NEG |
|-------------|--------------------|-----|-----|-----|

---

Legend. +: positive RRT-PCR result; NEG: negative RRT-PCR result, /: no data available; \*: exact date is unknown.

**Figure 1:** Timeline of mortality event within the bush dog enclosure

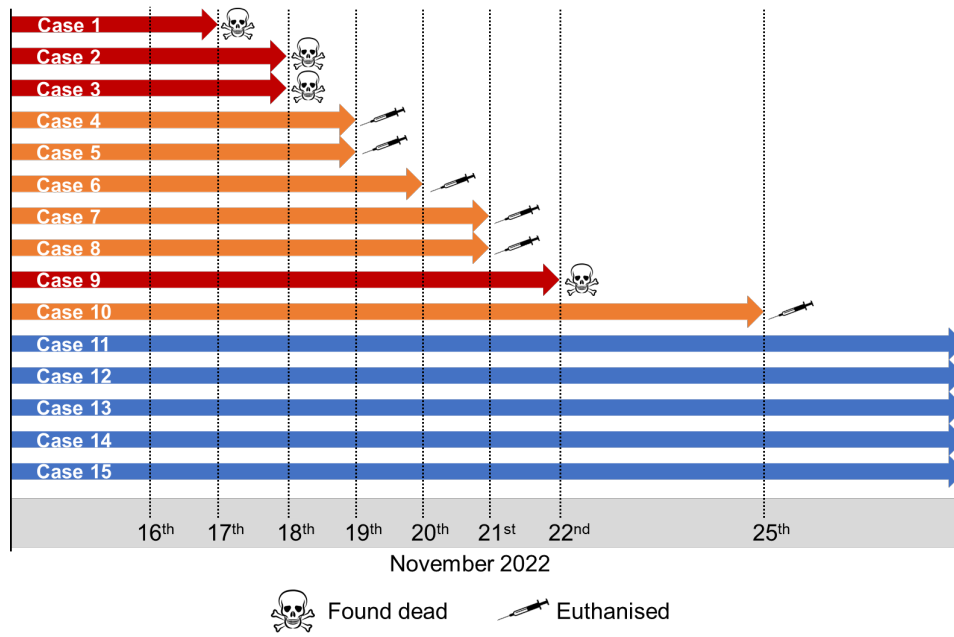

**Figure 2:**

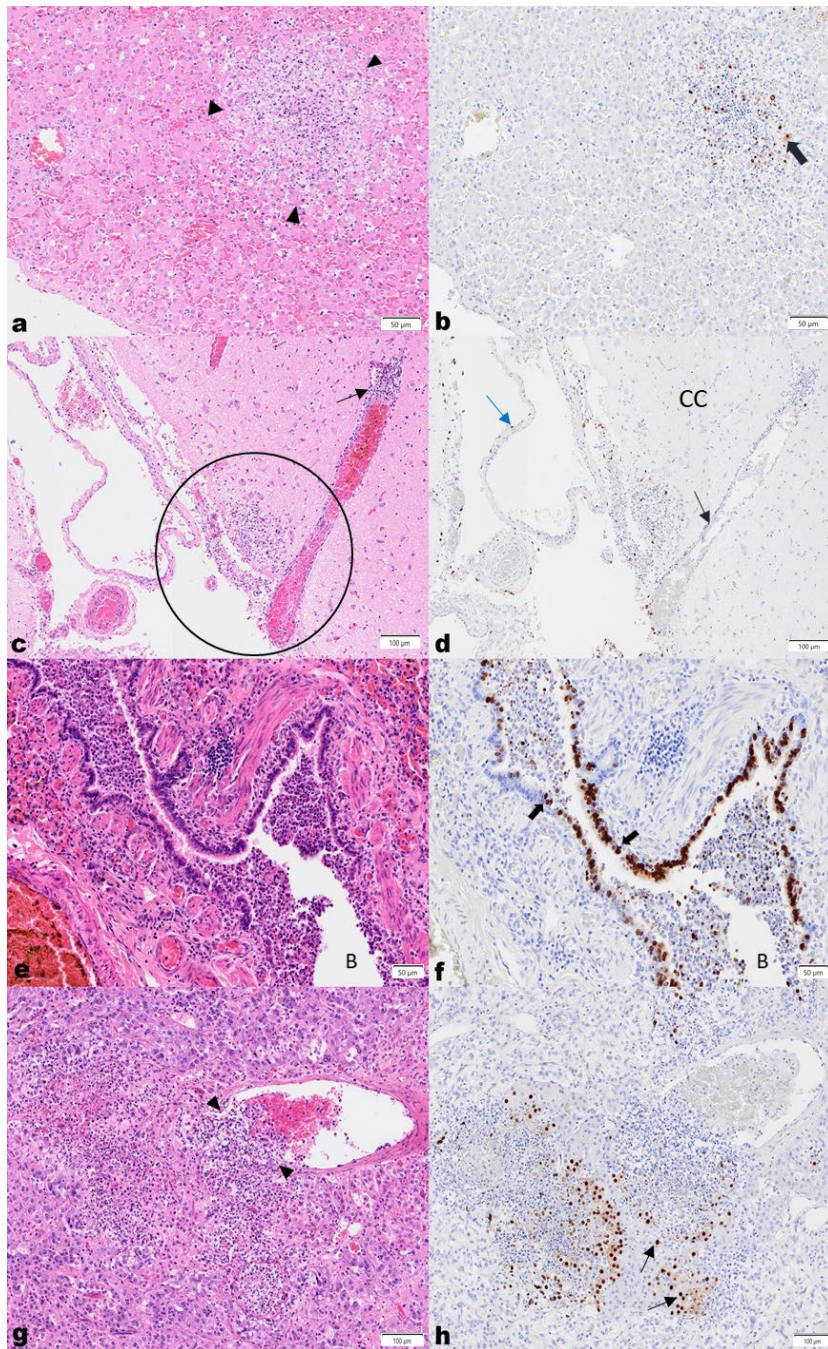

**High pathogenicity avian influenza virus H5N1 in bush dogs.** (a) Liver, H&E. Acute, random focal hepatocellular necrosis, comprised of karyorrhectic debris and fibrin exudation with rare neutrophils and histiocytes. (b) IHC shows viral antigen in hepatocytes (thick brown arrow) on the periphery of the lesion, and in cellular debris. (c) Brain, cerebral cortex (CC), H&E. Vasculitis with segmental multifocal infiltration of a venule wall with neutrophils and histiocytes, is shown (thin black arrows). Multifocal to locally extensive necrosis and inflammation extends from the meninges

into the adjacent neuropil (black circle). **(d)** IHC demonstrates antigen in vascular endothelial (black arrow) and arachnoid epithelial cells (blue arrow). **(e)** Lung, H&E. The bronchiolar lumen (**B**) is filled with degenerate and viable neutrophils, macrophages, eosinophilic material and shed epithelial cells, and the lamina propria and submucosa of the bronchiolar wall is diffusely mildly infiltrated by lymphocytes, histiocytes and fewer neutrophils. Adjacent alveolar spaces are collapsed and alveolar septae congested and mildly expanded by neutrophils and macrophages. **(f)** IHC labelling is present in bronchiolar epithelial cells (black arrows) and within shed epithelial cells and macrophages in the lumen. **(g)** Adrenal gland, H&E. A subacute focal severe necrotising vasculitis is seen with expansion of the vascular wall with neutrophils, pyknotic cellular debris and fewer mononuclear cells (black arrowheads), with subacute multifocal severe necrosis and inflammation of the adjacent epithelial cells in the acini of the adrenal medulla and cortex. **(h)** IHC highlights viral antigen in the acinar epithelial cells (black arrows).



**Figure 3. (a)** Time-resolved phylogenetic analysis of H5N1 HPAIV genotype AIV09 (AB) concatenated from genomes. Sequences from UK captive and wild birds, as well as the sequences obtained from the bush dogs are coloured accordingly. **(b)** A subset of the phylogenetic tree shown in A focussing on the bush dog sequences and the amino acid changes therein. Sub-groups A and B described in the text are highlighted.

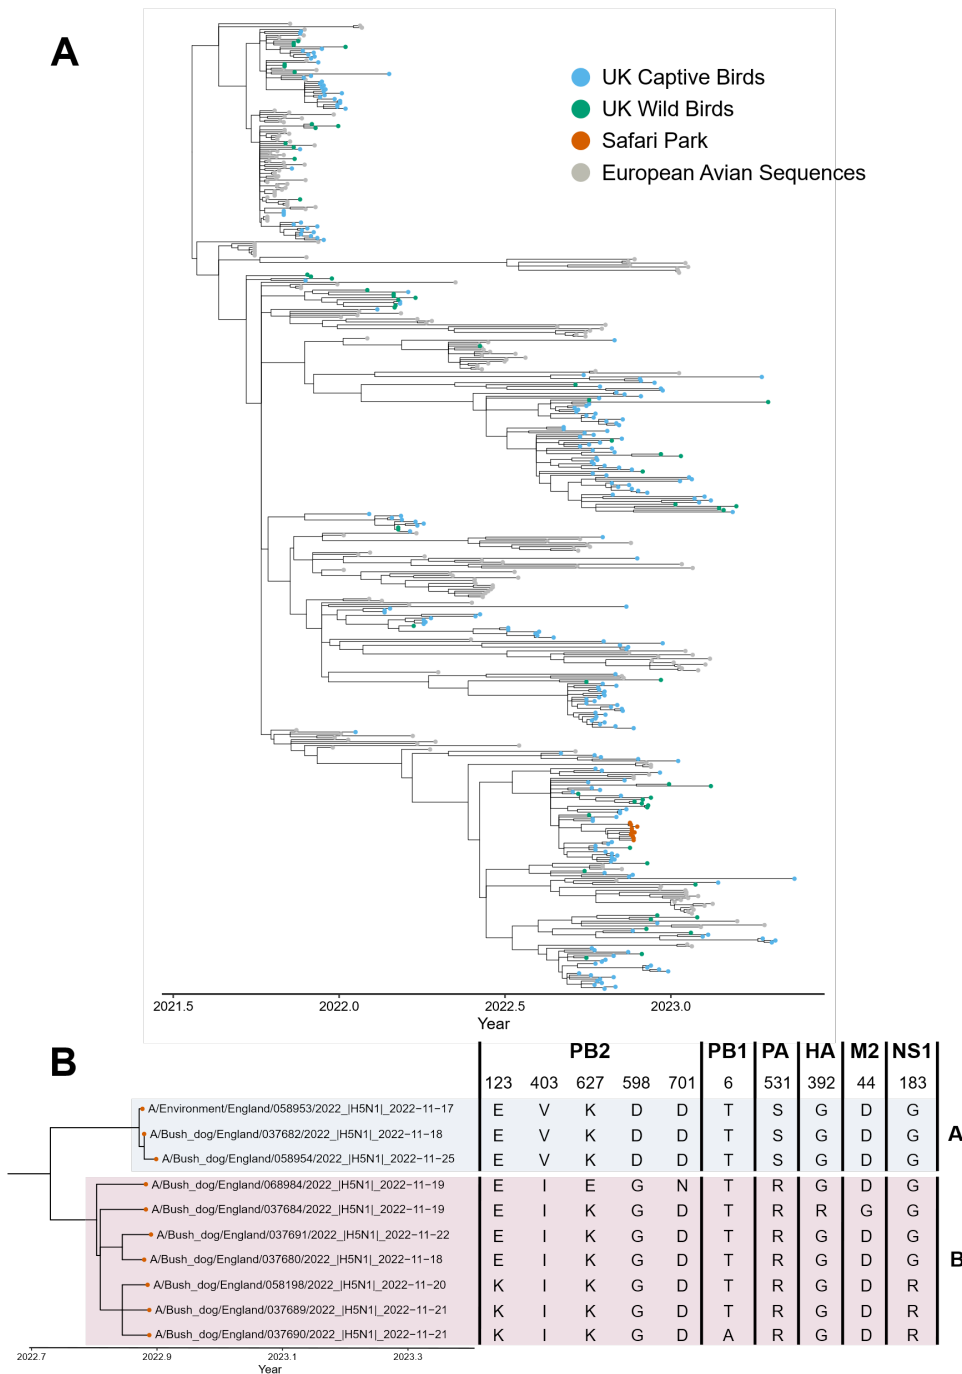

**Figure S1.** Midpoint-rooted maximum-likelihood phylogenetic trees containing the sub-sampled set of H5N1 clade 2.3.4.4b global sequences along with those obtained from the Safari park. Sequences representative of the predominant genotypes detected within the UK (along with their European Union Reference Laboratory genotype designation) are coloured accordingly.

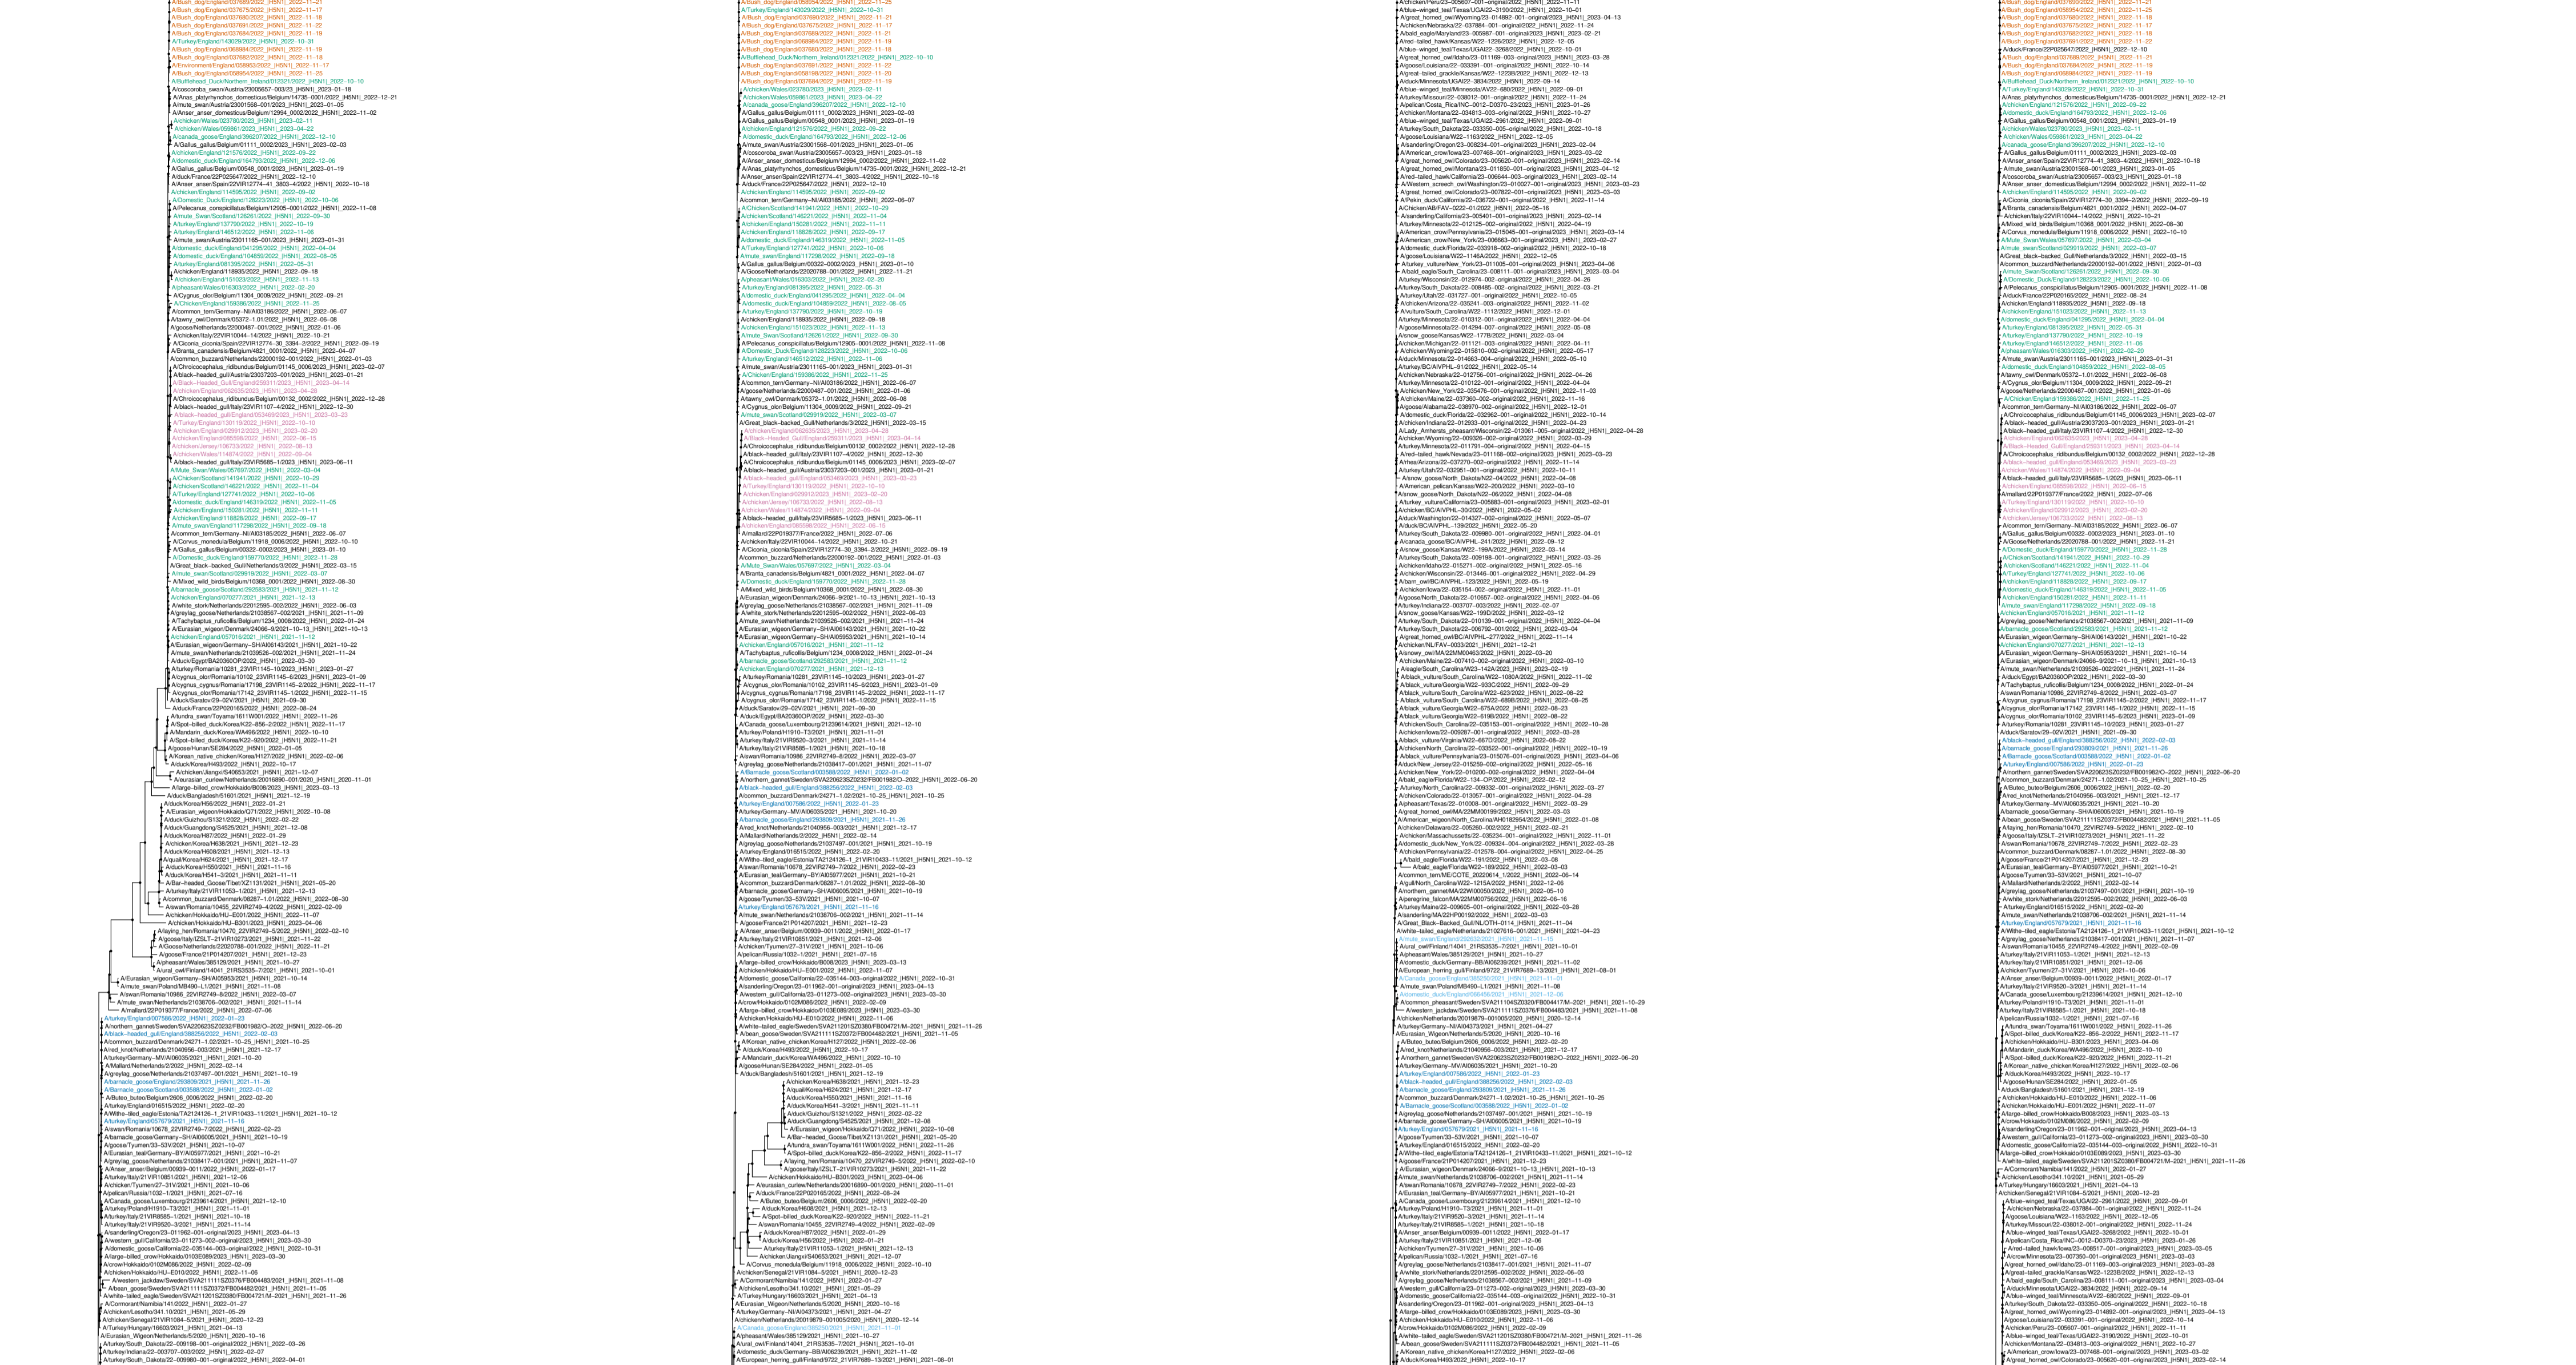

bioRxiv preprint doi: <https://doi.org/10.1101/2024.04.18.590032>; this version posted April 18, 2024. The copyright holder for this preprint (which was not certified by peer review) is the author/funder, who has granted bioRxiv a license to display the preprint in perpetuity. It is made available under aCC-BY-NC-ND 4.0 International license.

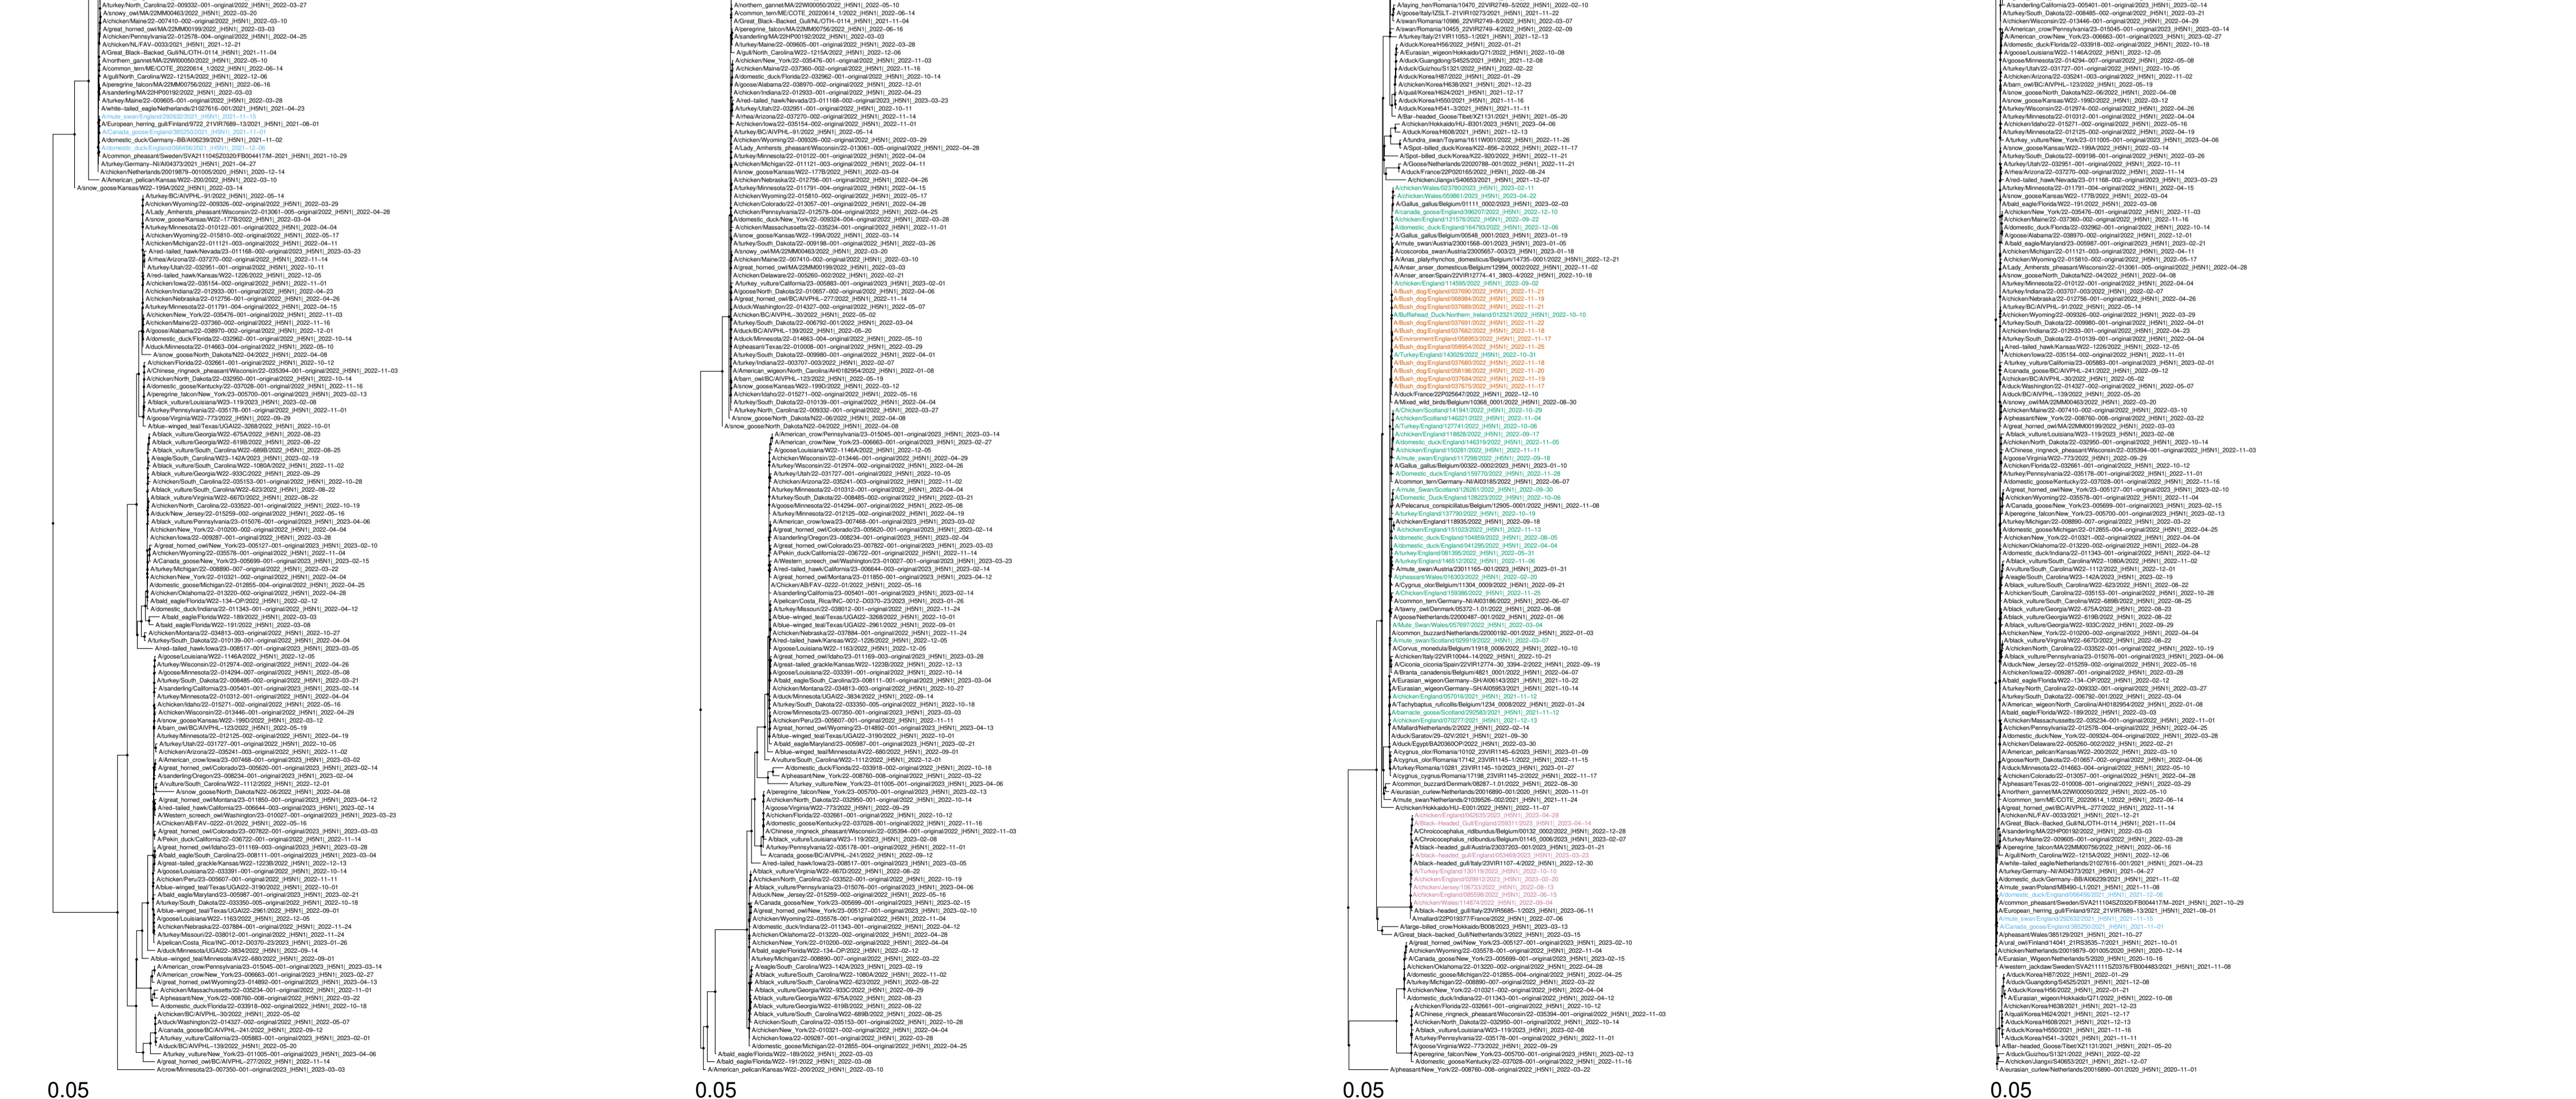

● AIV07-B1 (C) ● AIV07-B2 (C) ● AIV09 (AB) ● Safari Park Samples

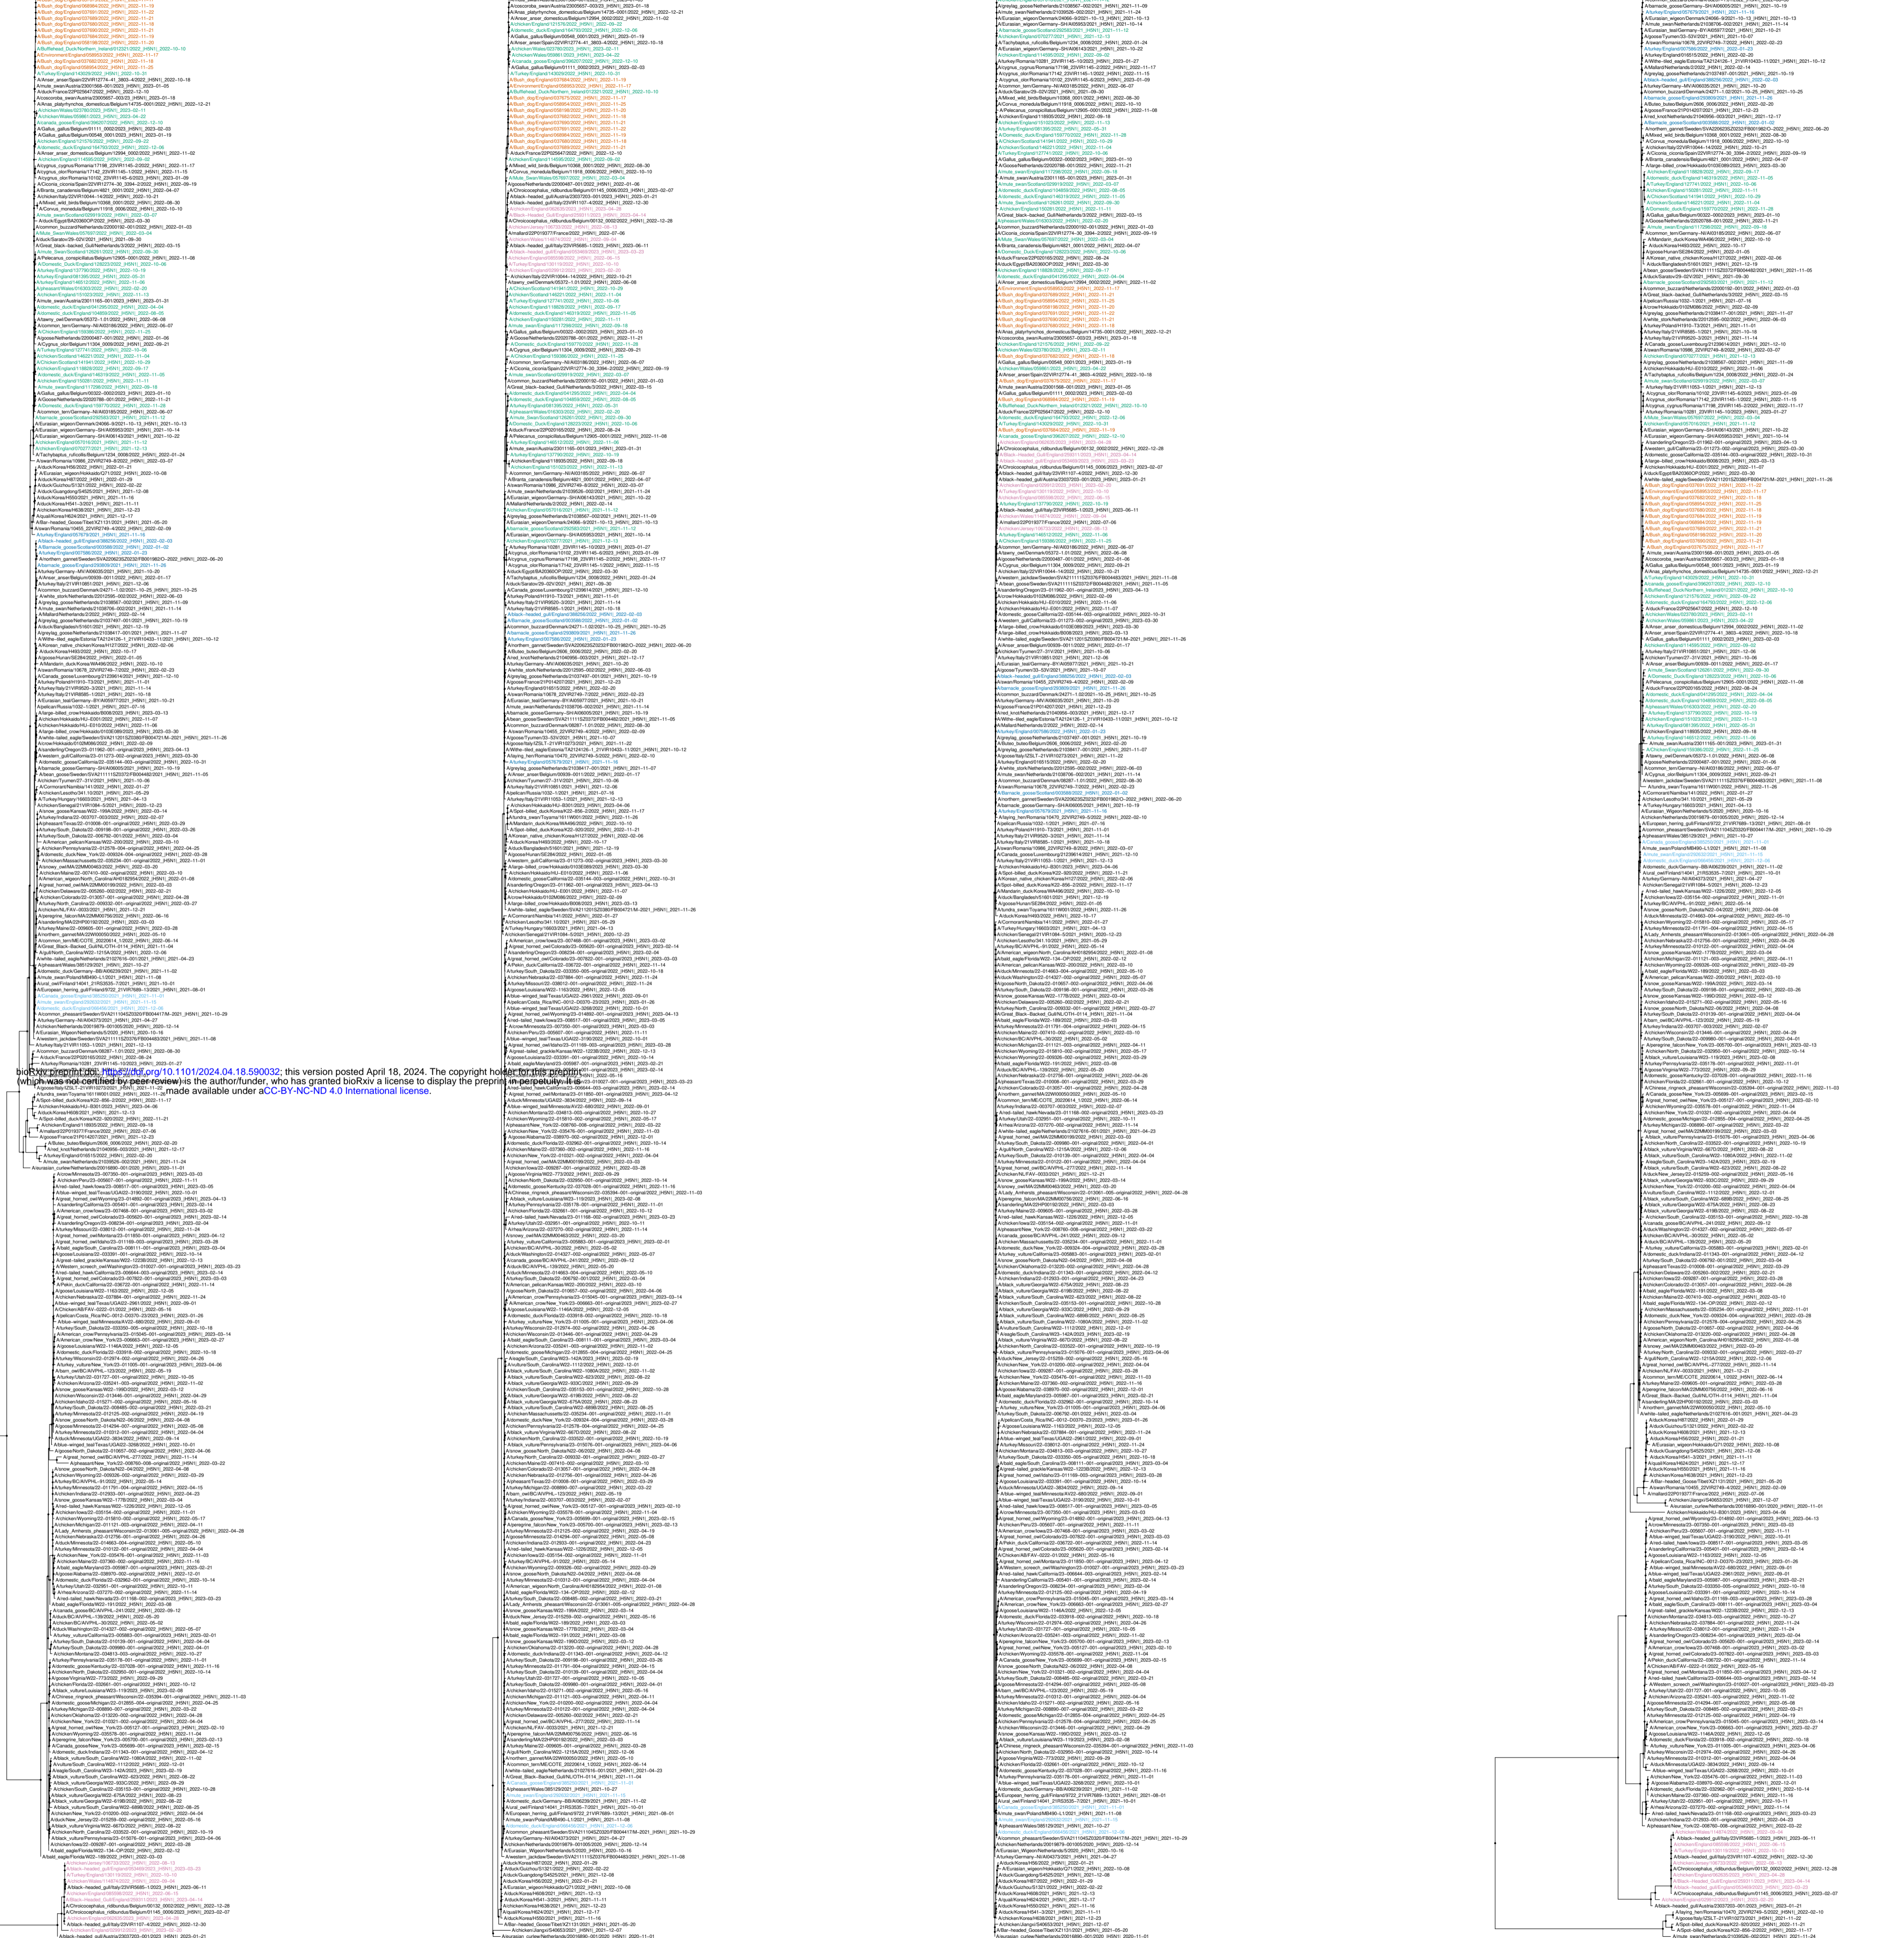

0.05 0.05 0.05 0.05

● AIV07-B1 (C) ● AIV07-B2 (C) ● AIV09 (AB) ● AIV08 (BB) ● Safari Park Samples

bioRxiv preprint doi: <https://doi.org/10.1101/2024.04.18.590032>; this version posted April 18, 2024. The copyright holder for this preprint (which was not certified by peer review) is the author/funder, who has granted bioRxiv a license to display the preprint in perpetuity. It is made available under aCC-BY-NC-ND 4.0 International license.
